# Supplementary material for: Postsynaptic burst reactivation of hippocampal neurons enables associative plasticity of temporally discontiguous inputs
Source: eLife. 2022 Oct 13;11:e81071. doi: 10.7554/eLife.81071 (PMC9612916; doi:10.7554/eLife.81071)
Supplement: Figure 1—source data 1. [file elife-81071-fig1-data1.xlsx]

## Sheet: Figure 1B
Test Pathway -20 ms											Control Pathway
93.0283	82.8201	110.782	101.253	93.8384	93.7813	90.236	109.871	107.414	80.3913		101.917	92.9526	101.192	103.659	86.1963	112.615	112.852	101.899	89.2898	103.679
109.045	98.5573	96.9621	93.2571	94.6591	95.5831	101.412	95.5576	86.1866	108.114		91.3411	107.538	91.2801	88.4261	110.452	89.2101	107.894	100.124	98.683	79.8915
113.059	96.4157	100.393	108.662	105.927	85.8307	67.2777	81.9048	92.4931	81.3169		84.8836	105.351	124.215	90.204	104.355	103.211	65.2477	88.8759	89.1258	98.9294
97.4749	98.102	117.031	88.1903	105.722	96.9126	103.559	105.45	77.6449	96.9206		107.085	104.839	114.425	102.285	99.5665	92.7234	86.0856	92.6203	104.586	78.4297
99.2809	100.003	94.7269	109.389	100.707	98.1285	88.7662	97.357	100.227	112.637		90.9627	105.421	98.8602	113.981	117.585	88.0954	92.3387	97.797	110.047	86.8551
104.408	94.1886	103.195	99.1355	99.7097	112.613	126.653	88.6773	111.529	94.6259		103.493	97.884	89.1736	101.816	90.151	94.3038	103.043	99.3228	108.132	97.9659
108.693	104.286	89.9889	95.346	90.8827	112.483	119.539	100.147	99.0446	102.7		106.694	97.3102	106.233	112.125	96.4354	98.5729	122.26	113.327	93.1155	114.562
88.6343	116.336	106.186	104.753	96.3846	102.337	92.0362	119.258	103.408	97.9854		100.503	98.5896	96.368	84.5511	97.2492	115.143	132.188	95.9598	97.6719	109.666
95.9279	90.4634	84.4168	101.528	107.502	89.8124	114.214	124.939	95.0269	105.631		101.148	95.1158	82.3647	101.028	101.845	106.744	85.313	106.072	100.737	109.623
90.4482	118.829	96.3167	98.4863	104.668	112.518	96.3061	76.837	127.026	119.678		111.973	94.9996	95.8883	101.926	96.165	99.3817	92.7781	104.001	108.612	120.398
91.42	122.733	78.5455	68.5689	122.43	74.6779	87.189	98.9165	76.245	92.5986		87.9572	97.7111	59.3236	82.3583	98.2073	92.9854	103.824	123.4	105.409	105.183
74.9106	123.898	50.1181	72.3898	105.241	68.3156	128.907	104.15	73.5059	84.4992		70.939	104.521	100.007	104.636	102.549	79.9867	128.879	98.8324	116.547	121.877
80.369	131.453	35.4006	69.6658	105.848	68.0858	92.1837	105.397	82.7685	99.5244		91.9614	105.715	80.8223	119.757	90.6385	82.5179	143.181	99.7197	106.914	127.057
76.8261	120.844	31.1664	45.009	119.681	59.2593	119.34	89.7421	75.6594	112.063		92.8484	94.0846	100.017	86.9999	116.77	78.6092	126.509	100.35	108.108	133.555
87.7441	130.746	56.4615	68.4168	137.049	48.3792	99.9586	113.072	74.7845	123.854		77.4523	101.203	87.2738	88.5564	102.69	80.6448	133.444	94.7065	118.807	124.697
79.0119	138.514	38.3913	69.0167	116.354	52.8087	98.2181	98.8395	94.1893	102.782		77.3778	98.0934	94.6282	76.4302	119.644	86.7943	192.446	97.112	119.813	113.085
82.1438	125.464	25.7201	64.5567	132.723	41.4854	101.862	117.594	110.169	92.2969		69.2021	122.572	107.099	83.7436	107.137	93.2422	180.017	99.0114	126.07	118.128
79.5793	133.999	26.46	54.8957	135.07	43.7942	105.838	109.17	94.7819	106.097		105.962	105.56	100.732	89.7937	109.344	91.1734	129.097	101.137	134.595	117.699
80.1557	117.231	22.0526	59.7509	118.678	35.8365	122.228	111.286	88.0998	87.1349		82.0674	100.388	106.205	98.4618	114.935	83.4966	122.401	93.8035	122.795	127.967
76.1917	133.756	22.0211	64.6625	111.513	51.6126	106.893	102.519	84.9733	107.064		91.9242	107.421	100.468	96.7295	116.721	97.1928	164.85	97.8514	132.333	118.464
73.3625	109.055	29.7182	48.4034	109.662	47.5914	101.078	124.697	69.4159	110.946		92.1289	91.2778	108.669	106.687	110.722	85.5382	152.303	112.455	121.606	122.287
82.7235	122.002	28.9155	42.3627	112.466	40.2684	100.453	111.347	79.9478	98.0282		81.112	86.8581	120.876	83.8609	105.047	81.305	136.667	98.6065	108.38	120.475
74.7073	96.2425	21.4073	50.5699	96.7289	63.5728	104.475	128.882	69.6375	94.1268		70.9824	79.0112	117.735	110.223	108.185	87.7464	203.968	106.313	121.514	110.8
61.5676	107.899	24.8072	43.6117	83.8905	47.3118	115.433	109.035	67.8387	86.5311		84.1206	71.3272	112.939	96.9704	106.837	84.6325	195.881	91.8886	116.095	122.394
59.5862	75.9911	30.2691	44.0775	92.3186	45.2084	104.921	108.584	89.1823	84.4943		89.8523	82.3764	85.5811	116.931	109.71	89.8869	184.591	94.2394	131.495	116.861
65.1195	82.3769	20.7304	53.8655	93.3157	43.8127	119.95	103.719	79.7471	95.7901		80.3553	86.5712	99.321	96.2932	95.4777	83.0753	200.042	103.791	123.453	119.132
63.2721	71.8072	24.9961	47.0625	99.8567	47.4603	112.111	116.866	73.8885	79.878		103.505	90.5799	81.2831	94.8213	99.3394	93.5667	183.478	100.872	120.316	118.571
71.7574	51.1665	15.3943	40.4643	96.0739	34.2982	118.014	120.364	65.0879	77.6848		78.9968	86.0052	111.368	96.0196	96.1042	84.0201	172.781	98.3965	115.147	125.231
57.2462	36.2252	16.0554	50.7745	106.996	33.6311	93.6813	96.8785	66.0842	89.3321		101.092	81.508	99.1047	91.4218	90.5579	71.6138	196.836	86.9142	116.255	120.763
62.5282	63.7729	14.4184	45.7853	96.4959	36.9921	159.903	115.323	82.1059	111.335		87.9665	93.6271	93.9887	102.454	91.7972	88.0947	131.002	89.0315	105.85	131.177
62.2021	57.9462	19.7702	46.1381	88.2735	38.6604	108.674	108.301	91.8141	100.17		87.5137	92.2393	81.001	106.856	104.566	86.4154	143.659	104.064	137.119	131.035
61.141	54.8161	11.2388	48.5798	111.089	28.0866	87.7944	86.4871	60.5686	88.6371		66.8573	90.107	81.4524	130.64	87.6266	84.4043	183.988	89.3975	128.861	119.284
61.5453	59.0975	11.1916	44.021	105.925	23.6187	114.56	97.9635	68.359	109.916		73.7366	72.7694	103.384	97.9147	83.1149	71.3013	152.081	121.221	106.324	139.787
59.3047	57.4261	15.5831	39.9351	94.0336	35.3446	101.938	95.1331	89.9173	78.8544		89.6414	81.4925	88.092	76.6125	82.9549	68.4748	144.32	101.214	111.055	125.083
64.0986	62.6319	10.0268	55.5732	101.16	42.6027	83.7316	86.878	81.8749	96.9265		88.01	85.1135	104.456	91.3697	79.6378	82.5339	182.579	81.1148	107.1	122.423
59.5918	64.1559	8.37405	49.8501	96.5274	42.1316	100.054	107.539	95.1599	79.6234		88.4628	82.9967	74.2675	92.4443	86.9059	78.5024	163.595	103.464	123.519	104.913
55.9327	61.7179	13.2221	41.2759	94.275	43.4473	109.625	100.47	63.765	120.739		81.4781	81.1513	99.8476	100.357	91.9436	75.646	168.404	112.977	121.864	116.012
53.0499	72.9287	11.1285	60.8095	98.6475	37.8321	129.517	83.2255	69.2853	87.2825		76.6583	92.5649	77.2863	85.1438	88.2841	74.023	168.106	88.0896	126.399	114.052
41.6337	48.5341	12.199	69.0378	94.9551	32.2134	101.847	88.7245	90.3513	94.5157		62.2174	77.0573	99.2082	107.273	96.7617	60.3395	141.053	100.288	120.112	114.863
57.7343	61.8406	10.6564	61.2611	95.8074	48.2156	119.173	91.6221	89.9942	100.049		89.6911	81.7949	85.7127	97.2245	76.668	63.4441	196.723	123.081	116.916	118.288
58.8178	74.9751	12.5295	57.0904	91.5902	32.1391	127.489	88.1853	80.9884	81.3626		89.4987	69.9083	75.1515	95.2251	90.7167	63.1023	179.693	97.4389	113.427	116.768
61.6938	75.6105	7.46106	74.2811	107.33	23.1663	130.493	78.1848	99.0422	79.4973		87.6874	74.5993	70.5432	83.8999	88.6996	75.6393	174.014	108.213	112.627	129.181
64.2628	74.2206	3.88799	58.523	92.7049	27.126	130.544	73.6293	76.7934	68.9595		83.978	75.8245	73.374	83.4897	96.8249	76.699	172.277	118.792	107.829	109.84
65.917	69.0962	6.67402	53.1033	91.6364	27.6341	138.825	89.3646	66.3338	74.4748		81.1865	78.2747	69.9978	85.6583	93.7286	72.4651	206.795	115.577	111.168	123.2
58.8066	63.7672	10.1999	49.8783	84.2201	43.7501	132.62	82.6796	80.8017	72.4425		95.0443	66.0004	86.5026	86.1662	98.507	64.7963	225.249	112.447	120.891	120.178
53.3526	57.6102	8.15363	49.6383	76.1719	37.4654	133.117	70.9472	74.0309	80.992		76.5838	79.43	76.9664	78.8528	88.6413	55.2769	203.506	124.148	124.539	119.083
57.6416	62.0866	7.25644	52.4822	76.8016	23.1396	133.313	79.6875	71.7374	78.3814		73.8916	81.1745	67.8253	85.5932	78.7694	58.696	184.807	128.359	134.703	99.4038
58.753	62.7861	6.48518	47.3519	65.9071	24.8834	150.28	93.6303	78.5525	63.4235		84.2012	77.5226	90.0011	107.95	80.5992	74.4444	187.629	135.786	119.345	80.7523
50.4921	61.449	1.96763	63.6252	93.618	28.8952	132.731	87.9225	76.217	78.6125		82.3589	91.9445	68.9538	88.921	107.282	58.6874	207.278	105.535	127.806	133.924
47.1346	44.3111	0.629627	46.5827	90.7316	28.0367	136.981	78.1241	69.9665	74.4396		82.5388	97.5196	60.4992	80.2204	94.0549	58.8937	200.265	121.898	101.451	116.188
55.9048	26.6549	*	41.0642	80.3997	25.1885	120.85	102.182	73.9819	76.2683		96.775	74.9017	46.0633	78.8007	80.5582	72.6277	182.478	138.386	122.935	122.36
53.6229	33.4587	*	53.5972	89.046	25.5412	125.251	87.0128	76.679	68.4175		81.2858	78.1971	49.4113	98.9176	93.0935	50.0199	189.866	143.267	117.038	109.421
Pre
97.6223	104.821	96.0207	99.8498	99.8294	105.953	109.75	101.972	107.207	104.124		104.762	96.7798	94.0055	100.289	96.3691	102.829	107.116	103.737	101.654	110.443
Post
53.1815	45.732	4.8985	50.4442	83.9405	26.509	133.219	89.7743	75.0794	72.2323		85.4319	84.0171	62.9857	90.9619	91.1176	62.9346	193.503	128.974	117.715	112.529
Norm
54.4768	43.6288	5.10151	50.5201	84.0839	25.0197	121.384	88.0385	70.0322	69.3714		81.5484	86.8126	67.0022	90.6996	94.5506	61.2031	180.648	124.329	115.8	101.889

## Sheet: Figure 1C
Test Pathway -20ms +DA -Burst							Control Pathway
76.1388	118.851	102.912	109.507	91.6086	109.617		131.859	112.73	90.3739	115.003	85.5177	104.639
74.512	107.923	95.8048	117.786	101.567	116.803		103.445	113.011	100.551	113.95	96.7924	91.2631
85.8799	123.873	117.463	101.13	87.5509	91.1452		81.3838	94.6212	98.5277	97.0602	94.597	87.1875
113.616	117.625	120.472	106.635	101.914	99.4405		85.3537	103.991	93.1809	107.405	110.139	102.892
126.859	117.779	113.318	90.5036	103.856	94.1192		97.1502	92.748	98.3675	86.3048	104.334	104.448
113.239	132.932	84.0341	89.0956	99.6994	97.0854		105.317	85.9112	101.293	116.604	90.657	91.0924
91.5478	78.5693	88.5602	99.7682	99.3283	108.009		87.3102	100.133	105.732	100.721	106.145	98.2274
103.584	69.4259	90.2178	94.9333	98.7839	90.2931		106.508	97.8625	100.124	73.712	110.159	101.791
114.305	75.0515	104.316	93.5852	105.65	100.389		96.895	96.1582	104.782	102.177	111.143	115.568
100.319	57.9703	82.9024	97.0563	110.042	93.0984
							68.6516	92.9907	102.911	71.2685	91.0217	115.61
							71.9693	62.5663	113.002	73.7302	82.0323	127.252
							89.6922	60.2749	125.564	61.008	67.6899	115.597
							89.1251	62.7795	111.536	66.5107	86.0097	114.203
							122.473	57.4076	104.213	78.7717	64.3244	102.503
							96.1577	58.4081	114.277	90.0428	77.4472	125.314
							100.184	55.1325	79.8108	73.5667	69.3808	113.465
							98.3127	67.2478	99.6196	72.8263	78.9521	105.802
							107.614	62.358	102.783	89.9906	85.8071	117.823
							103.814	61.3049	88.6885	70.6143	76.12	105.137
							97.2636	59.6909	79.2648	88.3805	70.5674	106.284
137.009	40.351	56.3569	104.067	98.6354	89.9635		108.351	62.1579	74.731	70.5599	63.9315	122.616
120.803	41.8608	61.9236	95.7303	85.0643	95.4134		95.0801	88.4636	98.2665	91.2192	80.4198	123.112
104.78	31.5264	59.3164	88.4403	84.3467	92.0373		88.1894	86.4394	97.9401	86.1027	64.341	131.648
104.338	33.1359	79.1873	101.98	52.293	127.003		80.4764	90.2007	90.7358	113.795	73.3209	133.676
111.364	39.778	56.8898	81.1017	52.8126	89.9554		85.9493	87.9928	94.4864	107.884	64.1176	148.635
93.9398	23.7681	63.7777	88.7215	55.4971	99.3681		98.4828	84.2578	79.3836	91.0284	62.2903	136.236
86.3864	35.9013	70.0525	78.9233	49.6703	87.6726		98.8232	101.812	93.5844	104.772	69.3437	140.912
67.3354	30.5896	62.2848	73.918	50.7713	83.6937		108.748	94.2194	86.1191	93.2177	79.7667	149.004
75.9127	51.8414	70.2405	74.3342	52.2065	86.0247		119.297	87.9829	98.403	79.5826	77.4265	138.872
60.8916	29.1695	60.738	73.5881	62.7838	75.9529		79.8809	92.8563	98.1123	73.7415	72.4279	143.431
51.1292	45.294	60.4862	74.436	44.994	91.531		93.7473	90.9174	90.0356	81.8694	60.9051	135.587
55.6227	17.6492	69.7224	62.8757	53.4311	91.4988		100.043	82.396	88.6707	101.439	56.2745	140.086
54.114	22.4526	60.8226	65.9285	55.2497	91.4426		89.7207	92.2641	91.2047	104.434	75.0203	139.455
52.9072	24.68	76.4663	51.6142	55.2249	86.8849		98.7098	86.7904	91.9999	97.0602	65.7673	125.173
59.588	37.5257	64.8638	61.5806	53.3693	72.2715		127.804	80.0143	97.2221	85.0761	62.716	124.859
51.7003	15.8555	83.3804	71.6865	48.161	82.7532		86.8567	81.3889	92.5696	91.1238	63.7952	125.975
46.6251	23.8329	57.9799	67.4227	43.9672	97.2379		80.0511	84.0576	91.5133	86.7203	81.0276	118.454
46.2264	24.9491	71.8417	78.3123	43.3115	73.0672		88.7565	79.5239	92.7595	84.7831	64.8535	128.212
54.5452	18.7105	60.831	73.1321	36.7919	65.3585		92.7832	73.7844	79.7336	67.6643	70.9561	123.064
50.655	23.2848	52.9258	44.2998	57.959	71.138		85.2118	74.0764	97.7146	81.4448	74.8921	117.399
61.4521	16.837	41.9661	57.3545	40.8992	70.704		111.981	73.0249	84.8669	90.3879	92.1205	130.196
38.3712	27.4553	66.8861	47.3991	39.2785	83.8142		96.8949	61.715	96.7651	94.5689	72.7215	120.478
50.0626	37.2517	63.4194	40.7955	42.8785	81.1616		116.007	68.8996	95.6852	94.3645	62.7657	119.779
45.332	23.5488	73.6533	49.9937	46.1569	59.6595		105.43	72.3376	86.4631	90.329	62.2074	126.792
44.6856	38.9259	66.5972	56.3074	49.3733	76.0092		88.0477	70.5989	83.1399	91.7892	75.2145	125.62
40.4185	32.8469	69.4384	57.815	38.9568	92.2945		90.7415	66.029	86.843	70.6553	74.1768	126.265
40.7418	27.5401	61.6237	42.0883	33.0805	86.8125		81.0152	66.3571	83.2409	99.2949	62.0958	138.622
39.1902	36.2352	44.3076	56.3583	36.396	82.5845		80.1644	70.9631	84.4396	88.2282	51.3089	128.23
51.3663	39.479	55.101	49.3384	49.2002	76.0895		93.4354	64.5544	77.7398	99.5197	54.7406	134.858
41.7869	35.5476	59.908	49.3096	39.2413	80.2533		70.3246	65.7141	84.8768	98.4546	65.8624	127.59
45.7092	38.1137	*	39.1219	37.6208	67.8906		86.4029	68.6732	*	102.972	66.0732	121.159
Pre
104.599	82.7898	90.0061	94.8877	102.701	97.775		99.0075	95.0162	102.983	98.3035	104.526	101.67
Post
43.7589	35.3831	58.0757	47.2433	39.1078	78.7261		82.2685	67.2524	82.5743	97.6939	60.0162	130.092
Norm
41.8349	42.7385	64.5242	49.7886	38.0793	80.5176		83.0932	70.7799	80.1826	99.3799	57.4175	127.955

## Sheet: Figure 1D
Test Pathway -20ms +DA +Burst										Control Pathway
93.2063	107.51	113.484	71.4459	85.226	112.93	92.0984	87.3375	93.1814		80.3862	104.058	95.5471	98.4407	88.8555	109.654	101.344	113.455	115.966
80.9876	78.2965	90.0034	69.2238	98.057	101.268	93.2313	83.8155	57.5918		112.433	90.016	102.258	85.8573	93.0582	102.591	111.572	98.1559	115.529
99.5262	87.0239	105.891	71.0874	90.3252	97.2625	102.76	88.3481	72.8077		107.993	87.9215	87.2893	110.97	100.826	87.1416	106.029	99.7878	104.913
97.7188	82.4301	92.725	95.754	103.433	89.6049	112.692	109.932	92.2767		143.281	93.6494	99.4725	88.1383	106.075	87.9281	98.5893	110.02	110.922
100.68	94.3445	111.983	97.1875	103.452	77.1499	97.9536	106.307	81.8258		108.297	100.569	90.7097	92.6751	107.461	92.3664	88.9879	98.4211	104.725
87.0347	87.7689	94.3602	108.692	105.733	95.8982	99.8483	100.524	92.2764		117.184	94.7835	80.7342	103.45	95.9365	96.4018	92.8488	85.5371	95.2476
114.287	115.704	111.155	136.45	99.0393	111.962	98.6637	126.078	116.968		108.514	138.542	96.247	92.3112	96.3525	102.866	106.441	96.2507	83.9359
99.9557	120.112	97.8098	108.817	103.409	110.598	92.7924	89.9431	130.656		94.6246	90.0333	114.995	99.8497	96.98	105.332	103.647	89.6618	90.7196
104.615	113.681	93.1786	135.822	97.6567	93.2575	95.281	107.054	141.46		59.7211	103.15	123.037	117.972	115.5	104.631	97.4831	100.628	90.8802
121.989	113.13	89.4098	105.52	113.669	110.07	114.68	100.661	120.956		67.566	97.2772	109.71	110.336	98.9561	111.087	93.0576	108.082	87.1613
										54.2989	81.5525	73.7839	91.7526	66.6448	96.2091	119.594	117.039
										64.105	61.3241	59.7105	77.2413	66.7791	120.855	121.128	137.089	68.0554
										65.839	82.616	48.03	84.5601	80.2985	118.229	96.8565	130.533	71.0779
										69.2301	28.9407	47.3797	105.882	87.4998	122.201	82.1127	106.422	71.5323
										67.3633	66.19	53.5831	96.448	84.3435	128.352	93.0351	111.974	68.8206
										65.2482	90.2649	47.9569	118.235	69.2343	123.504	89.1628	102.215	71.0584
										89.3737	55.4458	42.5742	98.7254	74.6296	138.599	85.539	113.753	75.3365
										67.7618	58.2286	31.9475	88.8843	86.9641	121.172	90.2071	95.9651	70.0268
										62.6367	56.3946	46.2305	89.3779	84.0895	107.031	75.4745	80.7759	63.8234
										72.2366	47.7158	86.4548	86.2068	77.7394	96.4437	80.0693	80.4822	66.221
188.41	116.761	139.993	94.5516	121.533	114.544	102.853	130.801	160.189		99.7427	54.3637	121.591	88.9491	71.2362	99.7379	80.3064	88.8296	75.7767
188.314	124.668	132.872	109.946	119.922	127.322	137.381	145.539	219.389		82.658	34.0151	85.6365	84.2249	70.4059	100.558	102.36	124.94	84.2492
183.179	123.917	145.584	109.866	123.162	134.759	132.936	137.855	308.393		93.2891	38.227	93.1733	88.1347	77.9103	99.3594	116.443	110.607	85.157
176.675	124.306	123.251	106.362	120.938	127.806	134.043	145.383	259.774		75.4109	53.7563	45.5885	103.266	71.4144	105.943	122.596	110.644	89.5056
181.521	113.968	124.27	105.439	126.213	121.204	129.144	141.453	256.727		71.422	40.4603	41.8836	96.5273	82.789	104.469	124.639	114.414	85.7272
164.029	102.651	147.297	123.942	116.292	125.253	129.964	129.754	195.079		75.5297	46.0841	28.2263	97.5327	74.909	100.347	122.223	103.99	86.7595
181.226	124.947	145.18	90.7633	123.266	114.294	115.777	126.326	187.66		73.8377	38.9618	49.1593	111.59	87.573	88.6466	119.452	114.602	93.5057
181.543	99.0451	151.077	104.597	129.299	127.19	139.492	142.782	219.494		92.964	44.2789	31.8614	108.538	84.2846	100.446	112.052	129.118	97.371
181.203	121.354	138.259	89.3745	115.297	128.422	115.254	138.571	268.641		80.7457	52.5586	51.4304	104.08	86.7115	99.0857	100.514	116.005	98.4464
182.779	119.31	127.927	89.8852	119.753	106.813	138.294	131.857	232.095		91.2824	56.7186	34.8059	86.5023	86.8127	90.2353	126.722	143.009	108.788
181.774	111.371	141.305	102.832	124.233	129.742	149.985	151.433	218.846		106.448	57.3433	48.652	106.581	82.5846	102.966	129.087	135.09	120.884
184.471	119.697	100.487	81.3464	124.027	150.559	144.795	138.214	209.511		65.2972	92.2899	30.3577	86.3474	94.0903	107.279	135.342	111.268	116.536
181.053	120.606	132.787	83.5058	132.048	150.031	149.208	151.838	214.035		87.8635	74.9787	38.3688	96.8264	82.2845	106.187	137.752	131.765	125.056
180.553	133.427	134.624	88.0216	131.309	136.696	116.981	157.245	273.512		69.1636	72.0973	47.2955	101.673	79.0329	102.131	125.932	139.399	115.24
190.297	136.974	112.555	81.0597	113.361	147.038	120.054	159.869	274.914		77.5399	74.0528	24.1844	82.9385	97.2694	111.457	134.749	120.179	120.745
174.839	129.613	123.99	128.018	131.315	150.471	123.276	176.853	272.23		71.7157	80.6604	27.4631	89.5221	99.2805	124.562	114.79	142.14	125.021
170.153	133.198	131.466	75.3254	122.106	160.197	140.012	163.73	212.497		59.6198	96.4615	20.8432	83.9078	81.2698	114.924	109.997	152.311	116.47
166.838	128.376	109.06	98.0836	141.511	157.689	109.435	184.611	221.229		67.1255	100.234	17.9672	77.1872	93.5571	111.534	114.084	125.327	123.8
169.055	127.197	97.5075	102.931	121.893	159.449	108.241	191.923	200.719		48.7229	100.303	28.7465	78.8917	101.402	114.463	130.832	113.166	135.85
179.412	118.529	100.901	87.0001	110.86	168.823	93.8801	175.903	211.547		50.0828	97.3235	27.1243	83.7637	101.477	116.429	107.971	121.443	127.114
176.101	136.923	103.32	98.4778	120.273	161.693	111.259	158.178	220.308		52.3796	112.928	19.9532	76.0918	89.2001	113.864	123.172	156.575	141.93
168.826	111.534	101.607	94.1591	130.327	164.554	133.04	159.223	237.772		60.0777	89.3334	28.3869	61.1444	113.614	101.953	117.855	148.329	149.889
190.614	126.62	118.401	85.4232	131.014	178.593	139.566	164.395	273.934		69.9293	73.8273	38.6836	78.416	100.744	122.639	130.453	165.391	142.934
197.782	121.563	89.8186	92.2596	124.763	164.554	121.852	161.092	264.313		74.7642	87.4992	41.4069	70.4991	110.134	120.344	125.249	140.002	152.149
168.031	125.23	126.068	102.707	125.582	187.968	124.867	169.224	225.451		74.5544	99.6783	55.4584	80.7619	113.357	119.291	126.017	135.205	157.805
182.97	112.561	118.597	83.5864	103.914	168.559	119.076	164.835	321.995		83.3537	107.466	39.7795	96.1921	110.155	115.377	118.464	132.52	129.985
180.64	115.581	126.079	80.3878	116.212	184.579	121.733	138.735	303.296		96.1942	91.3583	44.0668	113.381	111.517	114.589	118.035	134.552	136.316
183.561	152.407	109.542	90.2705	118.075	173.796	96.6205	152.339	266.409		76.4352	102.901	45.1757	114.415	111.09	108.831	100.418	138.591	145.035
163.862	120.477	110.528	85.0379	117.105	156.808	119.441	124.95	239.355		83.948	97.1729	45.6061	119.258	114.701	114.556	127.309	132.255	149.252
173.185	122.35	114.666	88.7294	121.203	175.601	101.849	123.037	267.224		64.4127	107.808	74.4938	109.882	109.82	110.615	116.404	131.937	123.514
164.187	115.687	133.157	87.7976	138.01	192.105	102.363	121.138	284.083		69.1497	97.0516	65.29	107.273	102.923	129.602	104.138	122.235	108.781
Pre
105.576	110.079	97.1827	119.06	103.901	104.357	100.253	104.852	120.463		89.5219	104.757	104.945	104.784	100.745	104.064	98.6955	96.0319	89.5889
Post
173.087	125.3	118.794	86.4446	122.121	176.578	108.401	132.04	272.073		78.028	99.2584	54.9265	112.842	110.01	115.639	113.261	131.914	132.58
Norm
163.945	113.828	122.238	72.6058	117.535	169.205	108.128	125.93	225.856		87.1607	94.7509	52.3385	107.69	109.197	111.123	114.758	137.365	147.987

## Sheet: Figure 1E
Test Pathway -20ms -DA +Burst									Control Pathway
71.858	144.175	88.1524	54.4859	87.1714	109.782	105.384			103.866	98.0521	110.652	94.3965	90.5491	116.155	108.055
103.302	113.355	83.5701	59.7367	99.1305	93.4234	99.8794			90.3683	87.4411	100.465	89.1343	93.0282	100.192	82.5337
107.654	108.472	102.54	65.2145	98.0589	127.488	87.6512			92.3882	100.205	106.121	91.8181	104.526	98.9944	88.5481
97.1534	106.283	88.6465	109.166	101.883	78.6295	96.8799			91.3511	97.34	102.763	101.852	82.6693	102.539	103.1
99.7406	112.141	105.813	100.772	99.4715	92.1253	97.0119			100.249	106.305	117.217	94.807	112.077	98.3895	111.027
100.428	79.5022	103.967	120.187	114.767	108.051	99.023			106.362	96.2517	97.3887	98.2843	102.831	89.8469	119.166
108.52	62.7487	112.321	119.247	104.27	72.8051	108.857			106.831	102.943	79.5613	98.2214	117.199	90.6315	82.8867
90.9101	76.0124	101.634	131.823	111.382	92.6745	109.415			101.12	112.969	65.1573	116.697	99.9975	116.669	102.984
107.99	95.4801	104.924	113.542	119.833	104.407	99.0316			99.2285	114.242	112.074	103.798	76.1554	99.8043	91.5072
112.444	61.4543	108.431	125.826	86.9036	120.615	52.3556			108.235	99.8827	105.674	110.991	91.9152	86.7777	35.2395
									103.182	67.5376	99.7203	121.75	108.573	87.408	89.6778
									109.341	52.6756	95.3878	122.346	107.549	103.813	93.4137
									88.9191	85.4122	108.849	140.448	123.928	95.2321	103.087
									93.8379	103.783	103.607	146.609	124.535	100.264	99.8068
									88.929	89.9637	120.409	149.354	117.376	89.7492	88.4005
									92.5472	86.0035	97.2069	131.627	142.496	70.0486	77.5847
									92.4782	100.901	106.038	134.812	113.809	73.8835	111.534
									96.202	76.6689	76.4689	132.049	127.077	92.8121	83.734
									90.275	92.8659	94.5774	138.001	124.168	86.6958	84.6133
									82.1572	88.5328	85.2998	121.776	147.15	90.7796	88.6829
90.8481	81.6556	46.7571	81.6802	92.4569	109.848	41.3416			103.471	73.7028	78.5031	124.562	115.036	95.9852	84.7674
85.5999	115.491	48.3951	93.8352	94.5272	106.487	39.9825			103.406	74.7542	101.457	136.532	114.657	75.9853	79.9019
98.2481	80.1404	39.6216	69.169	86.4408	122.412	51.4139			116.665	61.7785	90.4761	135.754	114.935	79.9367	79.7029
64.6937	62.3788	45.9337	78.7307	82.0811	119.067	27.7926			90.7234	50.9155	83.1831	137.503	135.931	88.2367	84.6198
85.3995	49.0554	46.2756	61.2926	87.8291	101.444	33.7362			89.4216	64.086	112.256	125.089	132.681	103.825	86.263
89.9898	47.7281	38.016	66.6083	106.9	78.5795	38.9726			98.4832	70.925	76.2044	139.253	123.549	78.4841	90.8268
88.6149	71.115	40.2344	80.092	66.566	88.8305	62.4235			91.5791	57.1497	84.3737	137.688	111.849	89.2135	81.3718
106.07	47.0183	29.3835	60.5471	86.928	98.7818	63.6677			110.234	66.5684	59.7827	134.189	116.681	112.56	107.477
90.3241	63.8224	30.5768	80.7079	93.1389	109.815	87.8813			94.0812	73.9581	58.0959	123.748	98.8087	109.655	71.7436
87.1451	66.9929	21.3376	75.619	102.711	90.2616	86.6499			119.493	63.6998	67.2577	125.246	101.25	99.9083	97.9582
90.1801	60.3864	26.9668	73.7068	85.2473	104.573	91.7585			106.302	59.2894	80.6529	152.099	90.2203	108.501	86.462
94.6712	63.7389	24.3931	79.6382	74.4087	109.282	70.6382			116.606	72.9135	70.1847	155.888	97.392	89.0118	84.3117
96.8557	56.1183	18.2203	62.7189	75.7971	74.5854	82.4489			127.722	65.6177	67.8199	143.435	86.7674	84.4743	60.9021
100.701	72.5973	20.1008	77.3044	91.5069	114.441	71.3114			93.3801	81.6871	79.0487	151.551	95.3934	85.5141	52.166
104.922	47.4895	32.3059	82.1016	86.1729	85.2525	67.5876			97.7055	58.3523	75.9397	142.601	96.7974	115.922	85.0434
110.873	52.6525	27.685	77.0777	88.6085	87.3659	63.2032			97.133	55.084	61.3868	143.936	104.032	102.861	69.2338
92.4836	50.666	32.9993	55.6204	80.9849	97.8832	56.7572			104.347	57.1498	68.6137	134.292	96.9493	126.296	67.9652
93.2785	61.6033	22.8785	70.6925	89.2174	115.556	58.3205			105.483	73.1721	71.7723	149.653	106.031	119.039	50.5421
106.329	68.9585	20.9192	65.4091	77.3072	117.736	65.0481			116.152	82.3119	49.1657	147.09	80.671	120.841	56.4153
95.617	54.5942	22.5572	47.3551	75.4804	83.7716	62.871			105.112	66.9547	60.0143	144.523	90.6504	85.3409	66.1592
95.6708	51.8352	19.1112	53.9349	78.4519	116.538	63.5569			114.934	48.6179	59.4686	143.859	96.7595	94.3592	66.9871
89.105	67.7744	18.7781	52.5734	74.6037	98.5988	62.5514			112.796	72.2518	57.5501	150.131	94.8749	61.3894	61.4413
83.7174	56.1719	16.3113	67.2242	78.1109	84.3206	60.3784			124.089	64.6134	54.5238	145.272	87.6274	64.5311	55.4846
88.1137	51.7427	17.0299	65.1497	93.2363	109.682	77.0037			114.288	99.9432	57.5998	147.456	94.6473	63.4818	60.2923
89.5142	55.8797	26.3151	53.3192	82.4463	107.801	63.0414			105.609	56.9516	63.7349	150.832	99.9216	93.1209	79.1702
97.6863	55.6232	19.0544	46.1882	80.5466	86.0846	68.8189			114.044	75.1774	73.5583	155.284	90.195	88.3218	65.1963
92.1172	50.9762	22.3031	67.0298	93.5041	97.0512	67.8986			110.827	95.2507	65.207	157.622	90.5871	82.5458	62.2372
87.3305	68.195	17.1854	61.6168	102.151	122.329	53.7744			118.921	82.1507	64.8762	142.954	91.7635	113.833	37.3321
90.923	53.2758	17.9752	66.2841	85.5396	130.5	67.3574			103.676	79.6348	68.2829	142.065	80.5823	103.501	34.3537
	59.9748	24.2352	58.8617	102.394	98.1829	60.1313				70.2666	74.4679	128.244	82.4291	104.837	59.1947
		12.9978	66.9001	99.7638	107.652	60.0163					83.4146	139.571	79.5199	111.495	37.5118
Pre
104.058	75.0395	106.255	122.125	107.431	99.7105	93.7364			104.355	105.258	91.9711	105.598	97.6196	96.7459	86.3567
Post
91.5142	57.609	18.9393	64.1385	96.6705	111.143	61.8356			110.615	80.496	71.2497	142.091	84.9764	103.242	46.1259
Norm
87.9451	76.7715	17.8244	52.5187	89.9837	111.466	65.9675			105.999	76.4752	77.4697	134.558	87.0485	106.715	53.4132

## Sheet: Figure 1F
Normalized values (%)
-20ms +DA +Burst	-20ms +DA -Burst	-20ms -DA +Burst	-20ms
163.92	41.8356	87.9059	54.4765
113.806	42.7346	76.7724	43.6355
122.247	64.5262	17.8175	5.10206
72.5777	49.784	52.5307	50.5158
117.517	38.0818	90.0093	84.0829
169.157	80.5257	111.423	25.0094
108.076		65.9697	121.422
125.834			88.0098
225.809			70.0373
			69.3852
