# Supplementary material for: Postsynaptic burst reactivation of hippocampal neurons enables associative plasticity of temporally discontiguous inputs
Source: eLife. 2022 Oct 13;11:e81071. doi: 10.7554/eLife.81071 (PMC9612916; doi:10.7554/eLife.81071)
Supplement: Figure 2—source data 1. [file elife-81071-fig2-data1.xlsx]

## Sheet: Figure 2A
No Pairing +DA +Burst
77.7791	97.236	122.797	108.633	88.929	75.7411	93.1291
82.1016	107.244	116.18	112.133	105.218	104.812	93.7149
102.181	93.7214	92.9624	118.966	102.431	92.507	91.8402
124.584	120.536	100.511	92.3252	107.351	90.096	104.946
107.189	102.975	99.3984	99.3414	74.3593	94.5567	105.716
113.383	92.8525	84.1504	126.445	91.6491	103.456	108.227
97.1735	73.4817	101.985	107.877	94.2017	108.145	95.9244
107.463	81.8881	92.9624	87.7236	148.865	104.635	102.385
104.778	113.524	81.2631	78.8141	88.7684	106.832	98.0669
118.882	116.541	94.7969	67.7425	117.39	119.219	106.051
109.342	93.6613	76.2406	72.4951	115.32	107.496	125.232
99.1654	125.259	82.1052	99.6129	136.379	113.999	129.132
73.6745	129.511	78.3158	102.622	134.108	126.695	120.027
73.9648	114.333	86.5263	76.6271	146.084	109.428	128.212
39.8532	116.437	84.5414	87.0779	116.908	148.776	120.613
70.5213	109.14	84.5714	105.051	155.845	98.7075	134.756
66.4732	106.807	65.8345	91.1363	142.59	105.203	133.936
58.538	116.191	67.1278	102.211	167.326	116.83	129.668
51.8447	145.865	64.3909	90.0575	169.799	131.354	126.621
59.6347	132.889	71.5489	87.232	138.809	138.993	111.089
63.8442	143.629	61.7744	79.6141	141.321	101.885	107.557
88.4158	144.138	67.6089	74.2418	162.516	113.092	118.453
79.0452	115.366	75.218	95.1655	160.905	108.307	121.399
61.7153	108.14	61.9249	92.3252	138.647	115.016	100.41
55.8283	122.034	64.1504	99.2019	142.884	90.9218	108.026
57.9573	141.476	76.3007	84.7367	170.37	103.116	93.1962
59.9411	121.635	78.4963	84.0321	133.787	92.4848	109.984
64.4006	124.242	76.8723	107.392	132.36	92.0278	111.758
64.4006	114.612	77.173	74.0069	165.155	96.8642	106.067
68.6344	100.084	72.7518	77.9701	118.26	115.93	110.269
80.5935	110.556	66.9775	76.561	160.292	116.336	108.98
90.4721	103.15	87.7895	73.1776	153.591	108.963	114.42
62.6023	106.446	85.233	77.1847	154.418	95.8616	106.687
89.569	92.0107	74.797	88.5603	140.536	110.769	108.545
77.5856	105.959	70.045	88.2593	143.034	105.232	103.707
93.5124	103.314	66.0151	76.5023	95.9816	103.787	91.539
95.9961	105.402	76.2406	54.1989	144.271	108.58	110.101
84.1902	95.9242	71.0978	49.3845	169.592	106.184	89.7982
68.965	75.9413	57.9248	62.0589	161.554	121.571	95.2047
91.456	88.0645	86.6766	61.6732	148.043	106.139	101.632
Pre
108.336	95.6575	91.0316	93.7204	108.175	108.457	102.131
Post
86.8239	93.7292	71.591	60.7636	143.888	109.252	97.655
Norm
80.1433	97.9842	78.6441	64.8349	133.015	100.733	95.6175

## Sheet: Figure 2B
-20 ms +MPEP +DA +Burst								-20ms +MPEP								-20 ms
100.161	73.6306	88.3841	98.8988	101.535	117.318	87.6299		98.8926	125.759	102.782	108.608	102.964	113.614	82.3216		87.8698	102.75	101.501	88.1554	81.7258	118.62	99.3394
105.584	83.5763	91.0288	97.1551	86.4206	116.342	93.4447		109.713	129.184	114.717	121.006	100.23	79.5788	84.0267		108.166	115.748	111.782	99.9517	100.356	89.6263	106.605
101.371	79.115	95.7037	115.999	91.2323	111.276	90.5453		104.841	92.3841	101.557	118.536	92.0462	89.5091	94.9412		86.3589	115.636	80.2715	109.091	75.8587	85.5531	98.4856
105.97	113.313	106.48	107.892	97.7901	121.377	103.104		107.724	95.9508	99.6614	104.375	96.0772	108.893	72.3517		96.5648	93.3745	99.5069	113.43	94.2622	107.301	91.2704
105.318	113.625	99.5117	129.275	128.225	111.706	112.149		97.6763	91.9425	99.5543	97.6716	101.173	139.331	115.141		116.929	109.78	81.9609	101.852	110.325	85.6377	112.939
106.502	103.675	87.594	102.814	90.9479	92.3948	101.103		92.2469	100.918	80.8137	95.555	93.1718	112.922	119.822		83.9916	102.275	93.2239	99.366	112.761	98.9445	93.1602
99.2604	109.704	111.693	79.4126	110.471	71.1203	110.967		107.154	88.1007	106.292	104.072	112.184	85.5256	84.5153		132.519	98.7628	111.15	94.1386	99.755	104.944	74.3675
93.9838	102.924	111.726	81.7987	111.443	115.624	104.113		105.665	86.1007	101.067	61.7377	128.014	91.7561	109.038		90.3506	76.5043	116.516	107.778	111.208	105.786	96.3463
94.9877	104.298	107.588	64.0256	84.8957	73.749	100.236		75.9401	94.0175	106.427	92.279	84.2893	101.391	106.399		95.4173	97.4949	94.7824	86.6303	114.199	109.379	107.614
86.8625	116.14	100.291	70.6942	97.0394	69.0938	96.7066		100.147	95.6425	87.1283	96.1596	89.8506	77.4792	131.443		101.832	87.6737	109.306	99.6082	99.5491	94.2094	100.59
124.411	123.661	140.87	111.761	49.0692	162.7	134.309		91.9428	104.684	85.0233	93.1861	129.062	108.439	115.685		90.2982	80.2832	95.5589	77.4921	91.6484	88.4274	94.9817
112.259	126.615	160.801	95.6255	84.7694	186.223	138.418		93.7801	84.7257	86.8184	101.25	113.643	107.872	116.76		87.0865	66.0203	106.847	91.3282	85.348	112.382	74.5464
116.515	117.832	149.86	89.4158	123.168	147.332	136.937		83.3714	72.1756	72.8566	120.3	127.903	104.91	140.598		87.1894	61.1468	95.5191	78.3018	81.7561	98.9118	75.8394
105.481	116.125	151.089	99.5411	97.553	159.77	128.317		70.1244	87.8174	80.3963	107.398	105.398	92.3689	119.594		89.8425	65.5622	109.47	70.9769	71.8531	106.419	87.1239
98.8744	105.614	149.125	85.7449	119.636	152.611	133.927		84.9552	86.4007	80.2664	97.722	112.55	103.423	117.411		79.9687	58.4924	97.5621	79.2806	85.0302	98.4288	64.4563
99.8268	122.465	147.226	107.892	88.4433	159.6	118.831		86.1145	88.2091	86.248	74.3372	121.86	129.332	119.844		69.5482	54.6092	99.5888	65.5496	67.7416	81.0527	61.0971
100.505	105.697	162.37	117.192	59.9524	149.534	113.772		81.9143	84.0674	66.7118	111.632	100.657	144.438	121.527		75.2054	68.4364	95.614	72.4809	59.3622	91.6292	40.8693
113.048	108.326	155.479	103.854	85.0775	162.634	120.501		75.9655	74.4672	71.0681	79.5283	113.393	126.348	106.779		68.3875	58.6708	92.1632	68.8007	57.3947	91.4984	53.8039
97.3042	103.657	154.206	90.6086	68.2563	166.887	121.793		76.2188	74.6173	73.6979	89.3559	115.14	97.442	134.896		71.7316	62.9371	76.0709	75.445	68.5185	93.992	65.6664
116.841	115.578	147.896	79.6269	80.6214	160.024	127.576		86.9571	92.6507	67.8856	82.804	112.345	88.1699	134.81		59.5198	61.1119	91.3446	63.9757	60.3055	81.1451	43.0784
118.025	122.794	137.416	101.499	98.6909	157.345	134.037		83.7134	85.0424	50.6122	75.3956	112.24	84.5269	133.409		66.268	58.4641	104.428	52.7834	56.4564	90.2747	38.4402
99.8267	127.956	141.059	78.5256	106.276	169.337	134.431		79.5449	86.734	58.1965	73.1783	99.6701	106.793	124.079		66.3743	54.3491	83.4408	70.3946	59.6145	97.0435	47.9605
113.838	107.425	151.385	101.223	104.964	156.335	126.079		83.7958	104.176	69.381	94.3454	105.703	119.175	133.637		73.6853	55.1316	78.772	79.661	78.1389	76.5504	43.6137
107.197	120.157	151.737	99.0822	97.2213	146.585	114.97		79.6209	66.2256	61.334	85.7777	114.851	70.4202	158.963		71.259	53.1029	68.7008	62.7909	62.9339	89.761	60.0381
109.642	101.976	143.32	81.921	102.404	146.82	117.854		66.6147	117.634	79.211	72.6237	109.312	84.0617	139.371		54.2766	45.4813	72.7181	58.7551	55.7148	81.3182	44.8327
112.765	130.568	144.549	73.7228	124.464	160.915	123.479		77.6	99.6925	57.0115	66.3241	111.147	76.4238	144.638		69.2219	63.0525	75.786	71.787	58.5903	93.1973	48.6206
106.965	101.579	153.141	85.5307	114.722	164.88	128.317		84.6953	100.593	72.9079	88.096	110.183	98.191	125.676		67.4901	54.7942	66.9229	75.3706	59.9978	81.1104	63.0591
119.663	110.684	147.885	124.748	87.3056	149.474	118.752		79.2472	82.4924	55.0816	86.3823	103.44	101.369	139.729		79.9911	76.3693	52.4251	72.3491	65.9557	93.8534	59.9313
124.125	132.894	150.376	97.0327	82.7388	169.971	112.449		80.5901	66.7089	66.5143	87.4915	107.433	105.784	144.758		63.1575	51.6903	58.8228	71.5649	54.0348	86.0649	49.5219
109.23	150.037	146.645	127.684	107.429	148.012	116.404		80.7676	75.2839	53.8909	103.367	105.703	93.7536	136.83		69.9886	55.9424	59.3237	77.8005	66.2988	83.2346	66.6417
129.238	137.738	150.892	88.3451	116.776	150.136	129.452		83.593	64.6922	70.6732	102.762	105.586	99.0989	162.71		74.2354	63.0404	55.66	78.6883	60.7294	79.7944	79.9301
105.953	121.202	156.291	119.18	126.747	168.004	120.769		85.3416	83.6007	64.3531	88.1968	107.527	98.1116	135.744		75.7735	71.6862	58.6034	75.3278	65.9507	90.242	55.4442
106.081	120.454	150.145	107.525	130.524	164.356	116.499		85.1008	73.0673	75.7293	80.6369	93.6043	72.4176	140.685		80.0706	71.5839	73.995	77.4045	62.4698	82.5227	65.1098
123.001	126.629	141.169	66.84	124.732	149.575	117.019		91.303	75.4507	92.3593	77.966	98.6	90.644	120.094		81.8224	64.2703	62.0314	82.7501	47.5776	90.8981	65.5547
109.659	128.708	144.176	67.5129	116.326	142.297	125.843		98.8292	64.1005	69.7703	70.3054	80.5079	93.9238	110.613		74.1671	60.1434	58.6198	76.6015	31.4442	80.6814	46.7726
131.315	123.363	150.694	72.8971	118.032	135.527	112.843		83.4093	111.234	81.2652	90.4648	91.7635	93.2429	106.008		56.935	72.8311	81.7515	98.8725	29.8551	82.8806	61.7136
116.154	129.616	142.606	79.841	162.989	156.833	113.977		69.909	105.951	66.1024	118.94	105.459	95.1949	105.422		62.5405	59.7777	69.0642	102.453	36.5042	72.2944	47.8037
131.263	123.975	150.244	85.4696	137.864	163.562	104.05		76.6877	95.6591	51.0017	122.115	97.4523	93.799	117.705		73.4141	84.8278	71.4216	105.441	47.1891	75.3575	65.485
127.651	127.345	139.83	64.9435	142.446	141.701	97.7466		80.2037	79.2923	75.3851	105.181	87.289	89.5885	117.303		72.9279	68.7488	71.5231	100.451	46.4272	71.6999	56.3217
132.868	137.373	142.189	96.1455	126.573	164.064	114.403		73.7735	95.1592	69.7477	89.2047	68.0436	89.9176	109.766		83.183	72.1106	52.7886	102.132	45.8018	74.3012	65.0704
Pre
96.3193	107.348	103.778	79.749	98.9594	84.3964	102.625		96.2306	92.9559	96.3456	89.9607	101.502	93.8148	110.243		100.822	92.5421	104.996	97.5042	107.494	102.653	94.4156
Post
127.85	128.334	145.113	79.8593	137.581	152.337	108.604		76.7966	97.4591	68.7004	105.181	90.0015	92.3486	111.241		69.8001	71.6592	69.3098	101.87	41.1555	75.3067	59.2789
Norm
132.736	119.55	139.829	100.138	139.028	180.502	105.826		79.8048	104.844	71.3062	116.919	88.6697	98.4371	100.905		69.231	77.4341	66.0121	104.477	38.2862	73.3608	62.785

## Sheet: Figure 2C
Normalized values (%)
-20 ms +MPEP +DA +Burst	-20ms +MPEP	-20 ms Control
132.787	79.8088	69.246
119.571	104.841	77.4368
139.788	71.3025	66.0095
100.138	116.941	104.513
139.046	88.67	38.2884
180.45	98.4437	73.3301
105.848	100.907	62.7833

## Sheet: Figure 2D
AP5 during -20 ms Pairing + Burst + DA
82.6356	90.2178	88.4008	85.1014	91.568	90.5015	145.259
95.36	90.029	107.948	103.684	88.9309	99.2291	134.169
86.4365	88.6517	102.859	111.444	107.073	110.606	95.1249
110.293	105.491	95.7884	94.9102	108.888	91.9103	87.0866
94.3339	98.8614	95.8979	118.27	94.0459	97.2709	82.3514
94.416	99.7213	108.856	93.9428	98.2164	96.1546	92.9383
114.578	114.109	112.457	108.407	107.747	91.5559	88.2191
101.46	95.6454	112.961	93.2844	106.545	100.523	95.9116
99.8424	103.648	105.168	88.1045	103.037	110.376	114.395
120.645	113.625	87.9958	102.851	93.9478	111.873	64.5441
79.9035	108.247	89.0728	36.6016	114.577	103.041	86.4196
69.164	102.578	144.733	78.4973	105.883	118.421	98.9791
46.2105	122.399	146.594	89.1727	119.486	104.74	63.6315
48.386	92.8745	125	78.645	104.754	110.721	109.881
54.6005	114.307	123.282	78.9271	101.259	108.586	96.4149
65.2809	115.601	134.38	103.227	109.526	106.814	92.9226
58.6395	113.175	96.2591	84.9871	116.837	94.3647	116.472
70.7894	112.112	112.567	77.0327	105.834	117.163	88.6752
69.0819	93.8276	91.2792	76.5222	128.477	110.535	60.1394
62.2352	94.8717	101.337	105.532	109.501	108.719	85.0415
71.6677	110.469	121.717	88.7562	111.084	106.264	96.0216
54.1326	112.452	103.942	91.0404	122.025	95.171	78.2928
58.2783	106.54	137.554	86.9556	114.212	115.763	104.611
66.7997	108.537	132.716	109.073	132.525	112.148	85.3089
53.6564	118.036	133.318	110.53	120.75	120.707	127.153
83.8094	114.508	101.436	97.5237	125.889	104.226	81.675
65.4123	108.225	134.982	78.907	134.66	132.403	92.2305
68.4087	88.6797	138.637	115.576	119.216	127.494	68.7757
51.0212	125.167	149.812	71.013	120.075	133.741	89.2575
60.421	113.648	118.816	79.3169	141.86	115.302	90.5787
55.9103	87.9969	114.482	90.7986	143.614	119.015	85.1201
42.7455	105.501	130.111	80.8419	134.243	130.622	83.1853
66.5205	107.167	126.828	81.0905	129.103	114.903	99.6712
41.4245	115.545	134.61	67.8553	132.084	116.932	105.004
54.1736	114.839	113.683	52.2687	133.764	113.052	110.699
41.5887	122.173	103.866	76.4885	134.488	129.851	116.96
37.722	114.631	117.229	73.3039	131.581	122.435	89.5562
49.1413	100.115	104.205	77.4021	139.186	130.471	99.0421
57.8925	101.439	102.169	82.4141	137.677	119.511	63.1597
63.7375	114.496	108.966	127.192	134.807	116.162	87.8415
71.2245	119.215	96.3466	88.689	124.295	122.205	101.685
Pre
106.188	105.35	105.488	97.3179	101.899	102.097	91.2016
Post
55.9436	109.979	105.783	89.8002	133.509	122.157	88.2569
Norm
52.6834	104.394	100.28	92.2751	131.022	119.648	96.7712

## Sheet: Figure 2E
-20 ms MK801 +DA+Burst							-20ms MK801
96.513	104.208	91.6221	80.5761	110.293	94.4517		89.5303	86.6404	96.7507	90.4733	119.761	88.0228	88.002
96.4826	108.812	100.052	87.627	104.759	102.551		87.309	117.972	106.617	92.0516	145.222	93.0903	104.827
88.5419	89.5559	84.6568	83.5069	109.861	95.9258		79.0071	90.0538	104.508	101.477	123.568	97.6259	107.309
98.4838	94.6095	83.7141	91.6553	102.422	110.062		106.919	92.8345	98.7249	109.413	97.2457	110.127	120.523
80.4184	107.171	95.2911	96.0645	79.5835	106.752		113.226	69.4696	116.949	100.358	96.7072	123.313	89.9414
86.4285	100.07	111.683	99.0347	71.4752	79.9362		116.209	103.049	108.47	95.2144	102.094	99.3057	116.924
100.4	96.7587	112.75	117.506	100.691	100.92		125.115	95.0389	89.1072	81.1414	66.8653	117.462	94.2504
105.361	98.9951	112.744	121.85	96.2617	109.409		114.399	102.177	86.6566	92.5818	71.5337	92.7824	95.3791
126.095	103.308	118.391	95.7031	112.162	101.516		73.7212	128.095	101.433	90.459	78.68	84.7191	93.5458
121.276	96.5119	89.0954	126.476	112.491	98.4767		94.5648	114.67	90.7852	117.813	71.1812	93.5522	89.2991
96.4506	76.0303	56.4892	73.2401	119.616	59.7006		115.847	134.559	60.6314	90.771	36.0687		69.8029
96.0996	93.0267	45.1175	86.51	140.04	59.8047		104.124	124.51	60.3036	97.0344	35.6951	99.4178	82.2212
90.6424	102.059	58.514	90.7091	119.443	53.1966		99.448	105.623	79.6346	75.0758	31.7091	77.9719	70.6598
90.7112	85.5769	56.1097	77.3629	127.33	54.6346		92.4277	109.631	71.5497	65.5692	35.2282	68.4388	77.0516
80.553	98.1384	86.6494	93.988	125.092	41.4454		94.9239	94.5484	81.3144	67.8239	42.2308	84.8312	77.2762
82.6873	91.6906	97.7848	114.056	131.599	46.3044		71.6852	116.484	78.6586	47.9434	19.4994	83.4873	96.0152
94.9684	95.5243	84.5315	80.4184	89.7915	55.3042		72.721	86.1061	51.9781	65.3823	34.3306	64.6593	80.5874
103.065	89.7156	89.9038	74.1824	130.689	58.9257		87.6215	111.117	60.9661	63.024	25.3888	78.7418	88.8064
111.651	96.3085	99.1898	73.1178	103.885	53.1246		85.7803	105.75	59.1874	76.4124	19.5353	66.969	78.9037
80.63	94.7836	52.8196	94.3166	110.744	45.8186		85.5186	95.0734	54.0363	64.5678	20.2895	57.142	109.192
83.7382	82.0916	70.6398	91.6487	108.856	34.372		73.0052	104.578	66.262	49.5624	20.3253	55.8401	96.0589
98.5318	94.6385	66.8723	85.6492	113.882	60.8752		86.2193	92.3819	65.5055	61.5512	33.684	55.3922	80.8368
116.672	92.7216	64.5754	67.0986	115.24	43.1045		96.2359	92.8968	49.676	51.4373	23.665	38.538	75.9479
104.741	92.1408	68.4652	64.1876	74.3658	55.7398		89.9795	87.4523	52.6933	68.6081	26.2506	48.701	86.2684
104.188	96.0762	51.6084	61.5065	95.0289	46.4059		74.3783	86.6984	44.2727	51.8496	24.5988	65.9052	89.692
67.9353	85.33	69.7568	92.4635	93.1336	47.2734		101.48	92.4063	46.4931	43.3689	26.6097	45.9292	84.9277
83.5925	83.0792	67.09	74.2809	79.6824	70.6332		79.396	86.4326	45.2557	46.6068	26.3943	41.1697	72.3372
11.2702	98.269	48.3063	61.4539	82.7543	57.0391		91.2712	93.3654	34.9019	37.5003	28.1539	50.0029	69.1382
57.3893	94.595	37.141	76.4232	69.5569	48.9286		101.308	90.3887	42.9517	49.863	31.6732	37.3481	89.0434
42.7527	88.9605	32.5651	65.5084	81.2052	51.7161		94.8243	92.7218	48.6176	53.7652	21.6899	43.5915	86.4742
58.075	91.8939	51.3251	67.7229	65.16	59.2521		78.9199	99.674	64.377	35.6478	22.911	63.6094	61.7111
56.2293	100.999	38.0448	73.177	90.5165	57.3501		73.8476	105.056	62.0637	40.334	30.2726	64.3093	59.8902
53.6865	92.3005	61.4254	65.9093	84.4254	41.7371		94.3132	107.82	61.9693	47.6752	24.3114	52.0046	92.205
48.1427	86.7676	55.2208	82.9681	94.7883	56.3233		91.1062	91.3327	64.3844	40.7241	22.48	52.8025	65.0225
53.0857	100.273	53.1596	84.9329	95.9749	50.7818		86.5639	74.6163	50.6974	43.444	21.2949	57.2681	70.3355
47.6092	90.3836	54.9881	82.2058	71.7092	55.9532		109.72	93.1812	46.73	42.1561	18.7094	55.3503	84.6782
57.8235	99.4306	71.7614	90.2687	94.9333	58.4347		75.6773	92.9641	55.1159	37.866	9.40858	34.2545	81.1923
68.9111	93.5494	60.7334	78.3814	69.748	52.2276		104.914	101.734	67.7696	35.3025	14.6514	44.5154	74.9065
67.7174	82.3095	47.5606	60.2777	73.0408	46.059		82.1357	91.034	70.1892	38.4266	17.4885	47.6091	81.4729
80.1958	89.6721	42.2211	67.9791	102.191	56.1806		90.5276	74.305	60.6994	34.0511	6.46386	61.3276	92.467
Pre
107.912	99.1287	108.933	112.114	98.6162	98.0516		104.802	108.606	95.2904	95.4419	78.0708	97.5643	97.8797
Post
64.4514	91.069	55.4529	75.8225	82.3245	53.771		92.5949	90.6437	60.1008	37.5605	13.3443	48.6114	82.9434
Norm
59.7258	91.8695	50.9057	67.6299	83.4797	54.8395		88.3524	83.461	63.0712	39.3543	17.0926	49.825	84.7401

## Sheet: Figure 2F
Normalized values (%)
AP5 during -20 ms Pairing + Burst + DA	-20ms MK801	-20 ms MK801 +DA+Burst
52.6742	59.7312	88.3492
104.463	91.8693	83.4622
100.284	50.9183	63.0706
92.2729	67.636	39.3546
131.011	83.4719	17.0872
119.687	54.8394	49.8257
96.7763		84.7364
