# Supplementary material for: Postsynaptic burst reactivation of hippocampal neurons enables associative plasticity of temporally discontiguous inputs
Source: eLife. 2022 Oct 13;11:e81071. doi: 10.7554/eLife.81071 (PMC9612916; doi:10.7554/eLife.81071)
Supplement: Figure 3—source data 1. [file elife-81071-fig3-data1.xlsx]

## Sheet: Figure 3A
AP5 after pairing -20ms +DA +Burst
73.6106	104.653	92.2317	94.6159	64.8932	97.0258
79.7013	101.531	92.739	120.358	102.915	112.225
110.848	114.952	99.8604	103.354	92.0116	108.043
79.4785	79.0455	91.0365	115.247	87.6778	102.251
82.1811	108.724	106.982	99.7987	95.236	98.6572
112.595	59.9459	92.3572	95.2442	94.2857	96.2663
99.8677	126.973	97.4598	84.4505	121.893	86.4013
135.346	75.7102	129.818	100.284	110.523	101.68
105.378	98.3275	101.267	99.9129	113.445	95.5178
120.995	130.137	96.2495	86.7349	117.12	101.933
116.616	90.5015	150.348	98.4851	113.253
131.639	119.296	137.496	94.416	122.942
122.335	133.597	139.626	95.7868	131.736
135.398	117.261	135.598	74.7847	160.86	93.276
155.285	143.424	98.1881	68.7883	134.005	91.7535
155.285	83.0352	107.715	98.8278	115.911	127.867
164.947	113.853	136.989	91.2465	129.138	81.5288
134.887	111.569	146.737	77.7688	138.46	86.9645
162.681	86.5368	144.482	79.0966	132.676	94.6349
133.398	129.04	130.46	76.7122	143.107	112.512
149.356	136.839	130.43	89.1192	133.966	126.737
151.007	107.84	115.685	95.644	166.199	111.516
144.947	88.168	114.224	114.519	152.95	116.52
150.985	96.6683	106.62	106.509	150.621	134.106
140.93	122.755	116.012	129.595	155.059	129.553
167.222	127.762	141.489	110.749	134.444	105.237
169.016	118.817	106.013	104.267	147.984	119.921
150.081	101.603	91.2674	100.498	179.31	119.761
175.037	110.601	144.854	109.222	165.578	124.753
158.141	131.564	100.011	104.667	146.161	124.702
155.486	148.201	131.826	109.307	154.554	123.089
143.143	109.055	124.188	117.631	176.009	149.922
138.149	139.717	142.664	114.976	146.364	142.368
120.043	133.363	91.6793	123.256	154.202	157.128
154.901	101.878	94.6373	103.168	154.472	126.85
133.071	100.344	109.161	93.8165	179.596	157.07
130.709	121.587	109.784	101.026	158.718	170.539
128.688	83.9788	133.207	102.326	155.51	144.309
144.807		115.816	120.115	143.986	155.184
132.971		131.671	100.384	145.776	171.545
Pre
114.836	98.2187	103.43	93.3253	111.453	96.3597
Post
134.049	108.23	119.928	103.534	156.717	159.729
Norm
116.731	110.193	115.95	110.938	140.612	165.764

## Sheet: Figure 3B
NIM after pairing -20ms +DA +Burst
78.5731	105.629	93.4845	87.6914	98.0566	84.19
99.3536	116.16	120.18	89.8154	101.537	112.223
98.9245	101.719	95.784	99.2507	98.4594	105.371
125.087	99.0483	51.8581	91.4293	100.087	108.779
112.049	97.8162	80.3867	105.332	86.8731	77.5249
92.1607	103.518	91.6513	85.281	105.534	103.747
108.984	96.931	151.575	110.191	104.003	114.188
105.165	100.232	123.18	109.116	100.812	83.3188
81.3972	101.877	105.182	121.025	109.756	99.0884
98.3065	77.0694	86.7189	100.869	94.882	111.57
85.6373	87.3678	62.5563	89.6383	92.3843	31.3554
86.3583	68.7977	64.8558	93.4858	73.0147	42.2578
104.478	52.3354	83.7528	86.8401	96.429	50.8644
75.0196	62.4526	76.4207	96.9414	99.4586	48.0249
87.3626	58.0891	84.8859	63.2959	67.3586	46.7573
85.6888	69.4749	75.4209	79.2042	88.4202	41.4938
64.17	73.3474	73.3212	76.288	85.4712	40.7853
77.938	57.3268	63.556	66.5156	85.6163	42.1429
89.4312	65.9378	75.7872	86.8823	80.8464	16.3478
84.5042	71.6109	93.3512	83.1359	98.8946	40.7834
113.654	68.4491	91.4513	92.0109	69.5663	43.6172
76.6161	58.9847	59.1569	79.0568	95.575	30.2965
95.3281	70.7623	49.1252	75.9973	84.7783	53.7384
88.3153	73.4302	62.1897	72.3942	84.6332	59.1475
83.2425	66.3879	67.0888	89.8196	81.9744	45.1969
99.5082	56.7801	91.8513	82.8831	78.268	43.4832
74.3585	69.2264	69.7551	75.6854	72.918	40.747
96.4868	77.9454	103.083	84.0588	70.4365	36.9808
79.809	62.5516	79.3535	68.2854	82.6028	60.6218
75.2255	71.3236	82.453	56.9242	93.0612	58.0407
91.5084	77.5613	77.3205	70.8434	85.8419	60.8018
85.251	73.4639	68.2886	74.9184	91.1435	60.5854
92.7272	71.723	68.8885	77.9779	83.3602	30.3233
73.1998	65.7263	50.3916	83.7849	97.3798	38.7519
78.2469	67.7678	57.6237	78.8039	99.1363	34.5031
91.4569	64.3346	79.6867	70.6496	107.484	56.3213
79.9464	88.2561	59.7234	79.1368	66.5528	47.0235
67.9038	65.2863	108.449	84.9902	99.6037	61.7055
79.4228	67.4693	59.9899	81.1512	70.1303	66.9691
Pre
97.2027	95.9255	111.661	105.296	102.997	102.382
Post
79.3954	70.6228	73.0945	78.9463	88.5814	53.3045
Norm
81.6802	73.6226	65.4609	74.9753	86.0035	52.0641

## Sheet: Figure 3C
AP5 after pairing +DA +Burst	NIM after pairing +DA +Burst
116.725	81.6872
140.538	73.6162
115.957	65.4342
110.897	74.9763
110.161	86
165.733	52.0508
