# Supplementary material for: Postsynaptic burst reactivation of hippocampal neurons enables associative plasticity of temporally discontiguous inputs
Source: eLife. 2022 Oct 13;11:e81071. doi: 10.7554/eLife.81071 (PMC9612916; doi:10.7554/eLife.81071)
Supplement: Figure 4—source data 1. [file elife-81071-fig4-data1.xlsx]

## Sheet: Figur 4 Bi
ACDKO -20ms +DA +Burst
68.708	83.6501	102.7	96.2402	81.6411	99.6663
108.084	98.9295	115.269	83.7563	93.2166	89.1748
91.5813	93.5142	100.517	84.71	84.3326	114.082
93.9465	80.7829	85.6666	104.736	87.8994	107.295
111.052	83.8675	103.569	99.0535	117.593	88.9886
110.063	97.5976	95.9556	110.77	116.608	115.451
93.8381	118.385	88.5423	94.1743	87.046	103.053
108.85	104.844	81.0398	101.521	118.228	97.1505
106.905	133.606	101.972	110.328	104.726	87.6131
106.972	104.823	124.77	114.71	108.709	97.5256
87.7928	77.0672	61.7097	109.579	95.7898	84.3745
116.969	55.8153	67.1275	113.032	88.5339	104.004
87.3116	79.0395	51.9575	128.267	85.7987	90.6618
89.4058	90.358	43.0068	108.316	110.569	97.6737
102.296	67.0783	55.2102	120.487	78.7746	94.4511
103.238	76.1192	47.2237	121.432	78.0525	66.9535
92.442	81.3147	58.8081	106.23	81.3348	91.2598
81.9508	68.1373	64.2136	116.067	94.9015	69.1526
88.9517	69.0806	61.363	124.343	120.569	85.5145
113.208	68.7962	49.9981	117.052	116.411	96.6992
89.7107	62.6295	71.1109	131.326	107.112	90.8071
96.8133	80.7136	46.4274	128.353	111.204	77.6054
90.009	72.2762	50.1867	129.552	94.2232	81.8393
84.3499	77.932	61.9502	130.065	127.834	73.2152
81.3205	62.7705	55.9953	139.221	118.6	73.6842
93.3569	75.5503	58.1262	133.023	114.923	73.1799
88.4231	83.5091	54.322	138.669	129.278	79.0951
80.7445	67.9314	43.7666	123.651	129.497	73.5061
78.1894	65.2793	73.2437	128.942	116.368	74.5568
75.248	68.2876	58.1234	120.043	98.4464	70.5009
103.482	79.7447	77.1849	117.02	111.554	66.8543
87.9961	74.163	62.7427	121.196	136.477	71.9498
102.289	85.3566	74.7182	124.247	139.956	64.8127
75.2413	72.5421	98.0285	126.705	129.781	67.3163
76.9695	83.8513	95.2663	110.806	88.0844	57.3603
72.1373	71.7652	89.5993	115.961	103.632	70.2876
74.1298	85.7866	87.9523	106.666	114.77	77.1474
78.4741	66.8054	88.4091	115.006	142.998	70.1258
78.9959	76.0613	91.1235	120.784	106.958	66.4044
93.994	77.2938	72.2176	107.095	128.446	87.4038
74.916	85.7242	105.799	129.852	116.389	65.786
97.504	83.3842	65.2197	119.583	143.479	76.5901
Pre
105.326	111.851	98.4559	106.301	107.063	100.159
Post
84.7768	77.8538	84.5538	118.464	127.654	73.262
Norm
80.4902	69.6048	85.8798	111.442	119.232	73.146

## Sheet: Figure 4Bii
WT -20ms +DA +Burst
118.367	85.4678	120.894	73.1117	96.5887	108.904	92.067	91.6333
144.406	105.157	111.16	71.0438	80.6488	88.2606	79.9452	95.4426
83.3191	84.3035	100.232	71.3767	93.9661	101.163	111.694	88.8802
129.659	106.937	93.6018	73.7371	108.767	123.693	121.354	99.5416
111.396	91.5286	111.382	142.189	95.3831	80.1032	100.479	119.638
116.846	108.136	97.801	123.184	107.235	94.1428	85.8096	104.645
79.7348	106.835	77.1903	115.276	111.772	115.396	98.581	92.4643
99.6164	100.329	91.182	73.2227	113.649	96.9451	100.889	109.347
43.1538	106.355	101.621	116.143	96.9077	97.0838	91.4002	98.9572
73.5014	104.951	94.9358	140.716	84.5105	94.3093	117.781	94.5271
149.673	109.423	232.725	116.577	110.366	125.274	76.9568	113.432
151.187	109.266	271.698	126.644	95.8283	144.502	96.9055	136.769
121.491	123.887	306.926	109.758	110.321	124.747	98.9058	111.837
131.731	115.327	212.366	98.279	94.3594	121.223	110.002	107.773
147.761	111.766	231.993	102.556	90.6535	120.918	126.466	103.935
122.575	113.854	246.33	95.0109	122.025	148.525	113.712	105.258
140.087	108.684	212.39	108.568	114.113	153.714	91.366	90.7625
147.178	112.142	198.804	132.464	131.032	148.442	109.215	78.6691
107.459	109.951	208.158	116.658	93.443	131.794	114.943	87.286
130.114	109.232	226.079	129.973	139.278	134.819	102.052	86.9284
159.995	107.691	202.014	130.497	145.473	155.822	89.9128	100.401
183.638	94.9528	172.499	149.623	118.69	150.107	86.955	89.2941
177.461	106.013	246.295	128.712	128.498	138.259	141.426	77.1361
148.13	120.805	251.571	130.518	126.847	124.941	133.732	118.711
170.585	133.509	185.412	164.824	123.765	179.962	134.057	116.294
172.792	132.995	194.761	133.574	118.876	156.877	126.5	116.072
121.331	123.75	174.305	132.586	127.764	120.668	131.082	130.902
143.789	119.299	139.128	139.122	178.937	143.947	138.485	128.654
138.315	138.098	152.573	139.324	152.399	91.7289	167.191	97.4656
142.452	143.919	110.848	122.287	158.171	132.96	150.214	111.729
168.698	139.912	120.939	132.475	138.978	128.243	122.346	118.841
128.214	139.57	93.3022	144.811	162.014	125.08	110.566	99.6442
126.504	140.118	134.211	132.838	130.977	131.323	146.042	115.275
129.111	141.282	87.1868	143.671	122.274	131.794	141.751	104.03
150.592	145.836	101.45	118.08	121.224	115.507	153.924	136.906
111.822	157.684	62.3883	113.854	121.565	141.284	128.278	137.722
159.701	146.281	61.1727	111.12	139.575	151.744	124.825	127.135
105.236	143.884	75.0967	133.231	115.938	142.449	169.721	129.733
148.417	157.444	75.1277	134.694	132.319	149.108	151	139.762
149.805	129.708	52.1149	112.633	129.514	145.667	167.841	149.442
132.659	137.07	46.8813	139.072	153.99	146.084	165.362	143.363
Pre
82.5705	105.321	92.546	113.708	102.815	99.5754	98.8922	99.9881
Post
139.164	142.877	62.0787	126.15	134.267	147.01	155.75	137.887
Norm
168.539	135.659	67.0787	110.942	130.591	147.637	157.495	137.903

## Sheet: Figure 4 Biii
Normalised values (%)
ACDKO +10 ms	ACDKO -20ms + DA + Burst	WT -20ms + DA + Burst	WT + 10 ms
219.134	80.5128	168.584	145.273
87.8474	69.571	135.708	143.478
155.25	85.8724	67.0773	159.436
182.811	111.477	110.994	188.959
115.718	119.234	130.642	104.49
137.27	73.1138	147.62	125.901
		157.448	121.785
		137.914	175.961
			228.45
			234.942

## Sheet: Figure 4 Ci 
PKI_6-22 -20ms +DA+Burst
83.5551	97.3093	84.5093	84.6094	89.8879	107.822
96.0881	109.426	69.336	104.68	87.4465	123.879
91.7769	105.368	97.7965	103.115	93.109	111.074
98.3013	95.7693	113.138	99.3236	138.499	91.0457
84.1594	84.4731	101.737	114.395	126.62	103.314
116.958	130.251	111.057	105.037	97.449	95.8836
95.9862	86.6867	121.844	108.681	96.7483	102.042
108.207	98.6528	132.504	91.0581	97.8559	92.0282
110.413	98.4326	110.968	99.0191	91.0858	89.8486
114.555	93.6315	126.445	90.0813	81.298	55.8756
84.8845	109.671	45.7092	89.6968	107.052	63.197
129.219	124.028	47.879	95.9207	90.5772	71.7435
120.882	112.032	57.0839	104.659	94.2505	69.5061
127.936	105.195	64.4078	113.429	95.765	64.2554
119.599	133.618	69.7721	99.9748	90.1251	65.4195
133.7	100.296	58.9858	107.936	102.829	68.5814
118.465	110.914	41.5218	101.561	94.5556	75.5577
122.091	93.7333	39.3309	89.1465	45.8199	79.2893
125.967	93.4362	53.1067	96.6035	67.3396	66.0552
114.636	81.3091	31.7075	85.9643	92.4082	68.6723
132.913	99.2648	26.6321	99.4391	79.3653	73.2131
133.055	120.628	39.7407	92.3078	101.846	53.7291
122.369	96.7364	44.7477	90.3439	76.4492	64.6269
135.079	113.357	39.9876	93.8727	70.3347	80.0902
122.091	114.899	39.3098	94.8179	59.2357	65.7084
137.075	66.6776	46.1505	93.2427	69.4757	56.6518
132.214	77.7662	41.5742	88.7685	88.961	65.6093
121.215	60.8487	39.0419	97.3072	77.8395	61.7043
118.228	36.8738	49.6868	105.058	69.8826	66.9138
124.277	58.1226	39.9771	77.7616	73.6689	71.4463
135.445	54.3039	59.3851	75.7767	68.0403	60.1853
123.082	49.9999	46.14	72.9724	59.7557	58.724
123.741	59.227	56.1644	84.0842	56.478	60.499
150.449	76.2617	56.0489	29.2289	57.9812	55.9995
131.433	55.6675	63.2362	48.5013	58.9533	49.3371
134.664	62.4455	38.6741	75.7557	37.004	61.2585
140.456	46.4405	43.2083	74.2748	46.1929	87.2645
129.457	54.1192	33.9929	68.9814	50.5441	62.1171
129.993	62.1117	29.1645	66.9755	42.4518	68.3008
146.933	80.3515	29.6584	61.1359	34.314	75.3183
121.229	76.3292	35.1698	62.9424	51.1432	71.5123
Pre
109.224	101.531	120.564	98.7753	92.8874	87.1356
Post
133.614	63.8704	34.2388	66.862	44.9292	72.9026
Norm
122.33	62.9074	28.3989	67.691	48.3695	83.6657

## Sheet: Figure 4 CIi
PKI_6-22 +10 ms
73.1947	89.9573	74.5792	104.084	70.8579	64.0797
90.0926	94.4849	72.307	81.8092	79.9146	106.669
99.4103	104.709	97.1616	100.002	111.679	91.8692
89.4155	93.9791	95.1574	120.361	116.268	107.418
103.096	100.569	110.934	106.898	112.033	99.4109
98.5249	99.8657	140.363	111.532	105.117	99.5982
97.1589	98.9649	130.481	100.575	103.213	100.03
125.074	105.223	105.709	95.9275	108.979	120.487
114.599	102.205	76.8307	80.5059	123.644	122.337
109.434	110.043	96.4764	98.3049	106.498	119.352
133.924	105.547	145.031	133.638	152.429	105.381
155.811	88.9381	151.08	146.75	108.139	131.905
148.631	90.7396	153.44	151.681	127.824	127.666
140.235	98.9018	144.707	139.986	127.156	119.125
140.938	100.869	163.77	137.727	155.585	121.616
132.889	94.8483	173.426	137.233	141.125	145.712
135.988	102.781	152.621	134.369	124.325	151.233
147.367	105.333	159.633	153.568	147.473	154.587
149.37	103.003	154.646	138.629	135.722	158.457
145.753	96.7683	156.506	129.377	134.868	155.33
160.792	97.0686	157.35	140.345	128.619	128.926
166.476	106.724	147.587	151.641	130.346	168.581
164.312	103.232	153.651	155.802	139.257	189.158
177.141	96.9817	173.364	145.343	135.418	170.664
161.277	97.6769	191.629	144.351	126.893	160.069
157.102	96.6577	160.272	152.422	127.938	176.338
173.701	104.844	171.035	139.174	135.449	165.063
157.128	87.5632	176.754	158.684	131.955	166.096
156.796	73.1985	195.905	167.45	130.355	184.629
146.827	77.4968	178.423	160.138	133.459	167.111
124.445	79.9621	183.179	148.397	132.068	183.352
130.841	79.7488	192.041	143.316	127.715	173.013
152.017	87.2709	172.292	157.807	121.276	177.485
145.334	90.2576	179.072	141.705	142.852	171.816
142.886	79.0613	212.737	147.935	149.7	192.642
156.609	90.305	168.886	133.234	155.271	155.427
155.319	81.6688	172.57	131.264	140.521	179.051
165.664	86.8126	182.195	128.246	143.415	174.432
167.527	97.3451	189.202	138.107	149.65	168.013
150.17	97.0449	211.104	125.729	153.458	155.903
172.2	97.7165	210.96	134.852	152.095	159.149
172.375	89.1276	196.642	126.345	161.556	139.032
182.11	89.42	216.705	131.279	173.625	122.558
164.201	96.8078	216.715	118.969	148.641	149.633
165.321	97.7007	222.841	113.29	136.458	159.938
164.549	100.608	235.351	112.749	146.615	146.557
155.648	101.533	222.403	110.762	150.818	147.624
192.512	100.047	218.168	109.555	141.08	127.955
157.073	113.077	208.368	93.797	120.522	138.618
154.988	123.23	208.624	114.321	139.03	142.415
162.31	112.5		128.808	118.918	137.211
193.023	105.555		127.515	141.025	134.759
Pre
108.958	103.26	109.972	97.3691	109.49	112.361
Post
171.981	110.882	218.583	114.799	132.115	136.192
Norm
157.842	107.381	198.762	117.901	120.664	121.209

## Sheet: Figure 4 Ciii
PKI_6-22 -20ms +DA+Burst	PKI_6-22 +10 ms
122.344	157.798
62.9261	107.357
28.3914	198.727
67.6858	117.901
48.369	120.639
83.6585	121.174
