# Supplementary material for: Postsynaptic burst reactivation of hippocampal neurons enables associative plasticity of temporally discontiguous inputs
Source: eLife. 2022 Oct 13;11:e81071. doi: 10.7554/eLife.81071 (PMC9612916; doi:10.7554/eLife.81071)
Supplement: Figure 5—source data 1. [file elife-81071-fig5-data1.xlsx]

## Sheet: Figure 5 Ai
Vehicle Control -20 ms + DA + Burst							Anisomycin -20 ms + DA + Burst
75.8567	84.6295	86.716	79.8272	78.0526			74.8103	81.0425	87.0718	86.3062	100.553	83.2414
88.3797	107.192	94.5377	84.2759	77.3851			97.6475	82.0349	83.3818	93.8429	97.4655	105.157
79.6816	106.987	66.4199	83.2681	99.32			107.67	89.4884	79.6576	82.4883	88.5564	105.802
83.856	111.013	84.7713	118.257	92.6096			94.4154	90.4756	78.7491	103.728	83.9935	103.19
96.5732	89.5331	109.461	122.467	106.409			116.43	113.755	78.956	101.066	96.4939	92.9487
107.834	106.322	116.836	120.779	98.5082			108.947	115.724	110.799	114.746	92.57	115.924
120.571	92.879	107.56	139.85	119.379			110.359	107.383	133.426	88.4456	114.71	94.4576
102.767	94.588	94.9698	96.7848	109.241			88.4526	99.0938	108.818	91.0136	102.795	88.8743
113.135	111.417	116.98	82.2221	105.76			100.688	118.743	112.439	111.303	106.279	101.106
131.346	127.402	121.748	72.2688	113.336			100.58	102.259	126.702	127.06	116.583	109.299
117.542	89.6428	85.6672	113.277	142.908			34.1068	73.7342	171.03	115.1	108.557	67.7174
127.871	96.1957	136.167	82.1418	165.882			17.3554	69.9381	154.021	124.211	108.634	76.4936
135.346	119.613	130.636	101.537	163.284			44.9659	75.2187	141.909	123.47	111.095	70.8081
122.357	114.108	124.73	102.032	158.775			26.9744	72.6907	147.396	136.102	115.443	80.244
130.977	108.333	130.765	111.783	141.404			35.6003	55.5483	121.396	109.327	107.72	97.2215
136.705	119.184	127.51	83.0533	141.205			23.1268	58.4002	183.663	90.8998	110.806	81.0757
123.502	128.907	154.764	130.778	180.439			27.6828	53.8038	128.341	86.2432	101.083	79.4297
118.571	133.151	125.191	132.181	160.344			33.3611	62.61	140.851	89.3391	100.756	71.9872
141.365	130.252	136.715	135.187	166.91			40.6322	59.1209	190.098	79.7809	106.9	63.4941
115.6	130.378	157.284	124.286	171.943			18.7827	52.357	158.006	94.5421	107.209	66.2931
119.386	183.938	184.826	128.61	187.6			24.7868	62.1451	174.608	64.5119	95.6637	72.5652
128.415	136.308	153.655	131.884	182.946			25.9555	59.1157	151.418	69.226	96.8244	78.2623
116.105	157.097	155.988	95.3132	169.526			29.9014	61.5288	124.269	79.3897	108.949	74.1937
131.288	165.088	180.159	114.047	175.641			30.4754	64.1509	155.067	78.6329	94.7559	63.6109
119.736	172.199	141.483	119.873	186.085			21.0478	61.1162	122.348	84.7468	101.338	81.8725
130.007	150.295	133.546	120.48	172.755			21.7305	53.5165	94.7401	63.8301	100.117	77.4947
130.395	125.798	146.985	112.684	170.031			15.6695	47.536	149.69	75.4566	117.913	58.5909
122.765	147.406	146.884	110.404	155.871			39.6341	57.8517	102.208	54.7863	115.544	70.9337
108.883	142.586	151.206	116.934	181.305			26.059	39.8684	118.493	68.8965	104.778	79.6165
109.31	137.406	168.001	102.769	190.234			17.5467	51.0094	83.2403	85.7342	104.101	89.4959
107.096	146.376	168.765	102.241	163.519			17.7588	56.1908	53.8771	80.1935	99.9162	74.4184
108.883	147.748	133.373	96.1162	165.774			17.1538	54.8589	50.4934	73.1659	115.375	63.8473
109.29	161.076	156.521	100.884	179.573			8.27435	48.9828	61.9042	71.3105	119.85	62.4463
88.8651	155.958	171.631	116.019	177.012			0.682581	39.7952	49.3909	60.7075	103.934	65.8494
108.902	191.547	140.258	110.165	195.862			13.5078	24.7578	49.2744	61.9466	90.0317	79.3976
106.689	176.39	149.751	108.719	163.844			24.3058	15.2046	44.223	52.6067	100.046	86.7349
101.408	160.864	138.328	122.027	172.412			17.402	27.7872	47.8802	61.9774	95.8827	63.5233
88.8845	203.122	117.902	96.4394	181.864			19.2482	35.6794	56.4804	70.9274	112.968	65.1723
95.5053	170.074	150.644	102.91	191.28			17.8002	36.9017	48.7999	56.6725	91.1545	57.9167
95.214	169.099	131.212	106.098	189.729			28.6551	41.5241	36.103	82.5324	93.7247	61.168
91.9328	177.457	137.363	102.085	169.237			25.728	31.2711	46.0332	60.2399	99.094	75.3992
Pre
115.131	106.522	111.619	102.381	109.245			101.805	108.641	118.437	106.514	106.587	101.932
Post
94.5889	176.123	135.09	105.912	180.904			21.7667	34.6327	47.0593	66.4699	98.5648	64.6359
Norm
82.1579	165.34	121.028	103.449	165.595			21.3807	31.8782	39.7337	62.4051	92.4732	63.4107

## Sheet: Figure 5 Aii
Anisomycin + 10 ms								Anisomycin -20 ms
91.9515	93.6691	90.1676	97.8211	99.1675	89.6062			76.2279	95.853	76.4624	88.873	105.442	110.599
122.469	84.8318	98.445	90.0466	85.6653	91.4012			122.861	92.8298	83.3362	89.1229	123.951	89.5332
103.987	97.427	107.245	102.431	94.3981	88.7235			107.225	85.6111	111.545	89.1458	92.5864	108.168
87.7303	98.7482	89.2835	96.3626	77.5303	92.8727			103.915	120.816	89.5985	106.463	94.5937	84.4725
77.5768	106.867	95.5117	88.0301	103.56	96.7277			104.932	112.721	107.05	94.3501	98.4728	95.4703
98.9675	104.93	104.633	99.2986	105.613	79.8952			93.9715	98.8375	106.347	107.952	92.6786	106.508
95.2028	104.853	107.848	98.766	112.813	113.472			102.572	105.451	98.2453	107.236	111.043	101.946
106.155	101.224	114.035	93.9466	94.2293	127.597			112.757	95.5137	106.38	105.338	93.8104	116.576
111.631	101.647	110.66	113.104	109.416	128.715			85.8196	96.1579	118.485	103.418	94.418	98.1078
104.33	115.88	57.5722	120.193	117.608	90.9894			89.7179	82.1241	102.55	108.1	93.004	94.4172
103.017	125.593	102.222	115.77	148.615	30.7221			77.5776	105.991	117.924	104.179	89.7038	79.2194
138.44	146.23	119.862	129.857	123.729	61.8562			85.5668	86.7663	109.204	103.066	68.9719	97.7032
90.6394	136.29	137.14	103.826	109.122	141.133			118.091	92.2415	105.811	80.6346	84.042	95.1668
128.23	146.692	130.59	126.338	138.284	153.316			103.191	94.7751	108.629	75.7255	91.1581	118.003
118.476	154.721	139.189	105.424	124.625	162.498			63.2634	106.872	105.26	85.2481	94.6945	98.4832
122.868	148.103	114.317	109.489	109.005	129.892			89.7575	93.8734	84.4141	86.5775	104.823	98.6149
101.42	150.322	107.727	106.078	160.467	136.572			71.5837	92.2286	87.3571	76.4415	105.197	114.796
97.1423	145.717	127.496	94.232	110.473	122.094			73.8066	78.8176	92.9373	68.2826	97.6175	89.6258
100.907	149.514	129.867	102.184	127.289	165.293			85.1491	100.71	79.0964	79.5663	82.8354	82.9136
97.5415	153.849	143.247	92.6593	118.063	143.223			74.7941	86.208	86.8832	106.077	99.9272	119.835
126.119	137.906	142.564	96.8002	173.15	146.077			84.082	89.1195	79.3208	83.5891	102.467	79.251
116.936	141.382	130.47	86.9204	174.696	138.985			120.708	71.5731	91.6262	93.0889	98.7263	84.1703
123.952	127.62	165.99	89.3047	149.394	169.266			101.371	72.6681	87.6238	94.7025	71.9064	76.728
136.558	138.779	161.45	84.5298	231.473	171.002			76.935	80.896	92.2736	92.4752	83.1349	84.8175
164.052	147.526	170.692	108.265	143.456	177.712			82.0975	81.2996	93.7755	80.4755	65.064	94.6841
126.462	169.933	170.651	96.8382	140.09	177.594			101.083	59.5447	92.754	69.6462	72.4277	94.6402
112.486	174.858	152.57	101.867	284.065	180.448			95.1405	75.9618	101.754	82.4755	86.8095	99.9019
105.071	156.363	168.723	87.377	283.195	162.557			90.283	72.2129	98.2984	74.6006	73.9108	64.994
114.711	169.702	142.765	84.8722	266.976	189.129			128.556	88.922	97.8018	72.8165	85.9801	57.219
122.754	172.524	156.588	95.6778	320.79	151.345			103.727	82.94	97.1392	110.509	79.1751	74.0623
100.565	159.711	160.285	98.2587	287.626	154.817			96.3077	94.831	121.917	81.7935	86.4121	108.703
116.365	155.042	149.556	104.847	255.164	168.354			102.904	70.6411	124.101	72.2142	87.446	114.291
130.055	165.918	142.444	89.8564	280.258	131.364			85.124	72.6165	92.8722	81.93	82.3689	77.5166
139.524	176.834	137.903	108.766	298.646	159.614			109.407	79.7537	103.563	83.7822	69.7091	85.6353
139.296	166.662	134.769	101.004	281.349	140.957			112.471	86.1221	86.7726	92.7592	54.5094	88.7349
168.502	183.567	128.662	102.837	278.711	182.008			103.105	76.2023	86.3085	83.9754	56.7499	91.4006
144.259	180.502	126.371	84.2253	278.321	169.384			94.6396	58.2178	97.3637	63.6917	65.2339	99.0524
163.881	199.407	121.268	92.9763	310.914	191.896			90.6185	72.9945	109.105	80.5438	60.9372	88.3448
170.327	176.782	131.474	85.0053	235.346	168.736			76.0434	61.3698	85.2143	82.1231	58.017	96.1577
158.006	192.635	147.587	87.4721	234.111	189.247			98.9771	57.2172	60.1165	64.01	63.1201	70.179
140.551	202.46	157.793	87.5799	251.343	185.951			81.0382	73.3122	71.2075	78.2255	53.4438	69.8159
152.416	160.429	156.548	89.8121	276.489	182.714			92.8235	71.3111	77.9024	61.4303	54.8232	72.1012
151.674	166.765	160.043	101.296	246.392	151.315			92.1392	56.5645	63.1007	79.5322	56.7009	53.4735
165.364	181.4	153.896	103.072	197.113	178.271			83.7033	64.2083	74.7946	59.9987	64.7184	51.2223
163.026	175.397	148.11	88.5121	254.254	156.848			81.9543	61.9366	98.3776	66.7372	70.9705	50.6274
181.849	184.85	157.432	108.595	277.009	186.275			81.5948	70.9031	71.4428	59.6918	79.4746	59.8249
149.107	184.875	149.556	107.048	277.321	180.507			72.8186	56.7835	100.213	61.1919	71.7596	57.1373
141.635	187.094	161.369	94.7456	255.462	160.85			80.3108	51.9266	93.3753	47.9761	73.7293	57.7772
151.902	165.803	164.423	100.155	217.009	158.849			83.8387	62.2244	71.3106	67.8621	61.9336	44.2516
185.272	184.183	152.409	91.093	259.14	149.667			76.5389	57.6209	81.996	48.7035	68.1626	20.1684
154.355	177.077	162.977	97.0983	307.028	169.737			71.018	52.4678	82.9263	65.2939	85.4963	67.9693
152.359	172.139	158.396	87.4657	275.566	173.092			68.5057	52.4119	100.867	51.7034	67.2872	55.2506
Pre
103.257	105.707	98.9496	105.062	107.936	108.134			96.9676	95.6168	106.401	106.409	96.9908	103.511
Post
157.105	177.259	159.915	94.1115	262.841	162.439			76.0424	55.3303	86.095	56.3078	71.3218	49.0834
Norm
152.149	167.689	161.612	89.5774	243.516	150.22			78.4204	57.8667	80.9153	52.9165	73.5346	47.4186

## Sheet: Figure 5 Aiii
Normalised values (%)
Anisomycin -20 ms +DA+ Burst	Vehicle Control -20 ms +DA+ Burst	Anisomycin +10 ms	Anisomycin -20 ms
21.3851	82.1807	152.081	78.416
31.8877	165.352	167.739	57.8645
39.7466	121.057	161.597	80.9211
62.4131	103.418	89.5433	52.9229
92.4578	165.659	243.559	73.5334
63.4347		150.231	47.4203

## Sheet: Figure 5 S1 A
Anisomycin no pairing
86.712	81.6508	104.683	70.9175	109.5	95.1404	92.7367
85.2565	108.356	106.738	86.6242	75.5088	99.6079	105.552
95.0408	102.845	95.441	97.5103	82.2129	96.178	99.7525
104.294	108.197	109.586	97.3644	105.442	108.307	101.225
97.0218	101.945	101.494	104.41	93.0924	96.0051	103.178
106.087	126.318	100.915	105.929	94.2685	82.02	96.4446
104.475	107.137	94.6537	116.501	102.972	103.28	98.1305
104.843	96.593	100.657	112.373	106.441	121.998	98.0025
109.458	97.1228	93.8956	102.281	119.005	97.625	99.5337
106.812	90.4998	96.8065	106.089	111.558	99.8386	105.445
135.458	88.3802	78.0612	106.397	80.5898	46.7631	101.719
136.564	97.3348	81.9619	99.9959	99.7375	80.9938	105.696
122.322	98.5004	75.2773	101.054	97.9145	122.874	101.481
130.681	105.336	70.1913	103.43	122.731	102.179	107.862
111.71	86.8968	63.5444	109.929	110.382	101.683	129.037
112.985	99.0303	65.6697	102.851	100.326	109.114	110.444
102.584	89.5461	50.6246	95.9507	100.561	98.7778	119.402
99.7095	96.3811	64.8498	97.3873	103.678	75.3329	103.103
109.095	103.534	75.6135	94.0854	123.672	98.0861	97.0742
109.645	112.012	59.7535	104.397	118.379	108.699	109.991
118.928	118.317	70.567	87.1578	116.263	103.937	104.25
104.426	106.501	63.7502	94.0353	116.145	94.6158	101.913
99.3531	106.448	70.6528	95.0704	127.73	75.6153	109.308
111.233	110.793	76.4832	84.9277	101.149	106.802	103.306
112.187	124.093	67.8345	93.8254	111.205	110.872	102.527
113.637	125.629	62.3317	102.349	122.672	114.4	96.8341
91.1029	109.84	65.5274	99.9321	105.442	100.438	98.1146
97.4084	97.0701	72.049	106.499	135.845	89.122	97.661
96.3091	95.1626	82.2124	106.066	111.852	92.7999	100.137
96.7863	111.005	72.7558	93.5928	107.735	105.816	101.796
94.2858	119.43	78.4953	98.2629	96.0326	80.0484	96.1939
92.4075	123.457	62.7245	97.7749	108.088	91.6642	102.879
111.185	97.8647	71.3372	114.549	101.972	94.7656	94.1771
91.6284	107.561	64.1654	98.7873	106.853	90.6497	94.1184
103.78	107.614	68.5532	106.08	112.969	101.078	100.046
122.117	103.481	76.7439	104.908	118.497	95.6131	98.3493
130.699	122.715	58.678	105.824	100.267	85.9572	90.5813
132.1	117.311	56.997	94.3499	116.086	107.828	70.5208
111.656	130.451	62.2511	111.347	102.796	97.7575	79.1265
103.653	124.516	49.5576	105.186	94.5036	105.39	91.2427
133.049	135.273	69.6373	102.267	117.086	106.249	91.2694
116.904	129.762	61.9149	103.029	129.729	89.3756	76.5923
107.314	125.576	66.9665	105.076	128.553	91.0821	80.6043
102.584	124.146	53.5818	79.4458	126.613	71.1016	91.6269
97.1064	149.791	67.1672	87.9467	119.497	90.0098	81.4153
112.218	124.305	57.9988	95.3623	115.38	83.3457	96.2899
102.53	99.9314	62.0556	113.646	145.019	73.5977	96.4606
107.549	122.185	49.784	98.1443	107.912	88.6839	93.4783
111.318	156.838	62.5598	82.3738	114.204	73.811	91.4829
114.126	154.506	65.3782	92.3706	141.02	67.1528	89.6316
127.251	126.795	67.2633	80.4856	149.547	62.5872	92.7313
110.267	112.118	67.4554	74.3151	133.963	59.0015	85.4754
Pre
106.335	103.534	97.3856	108.635	106.849	100.952	99.5113
Post
114.102	134.488	62.4881	85.5379	129.329	70.2473	90.5599
Norm
107.304	129.898	64.1657	78.7391	121.039	69.5846	91.0047

## Sheet: Figure 5 S1 B
Spike Amplitude			Spike Width
AM	Vehicle		AM	Vehicle
0.0971	0.1006		2.6	2.8
0.107	0.112		4	3.2
0.12	0.11		3.4	3.8
0.119	0.123		4	3.6
0.113	0.114		3	3.6
0.115	0.109		3	2.8
