# Supplementary figures and images for: Postsynaptic burst reactivation of hippocampal neurons enables associative plasticity of temporally discontiguous inputs
Source: eLife journal article supplement (doi:10.7554/elife.81071), 2022-10-13

A

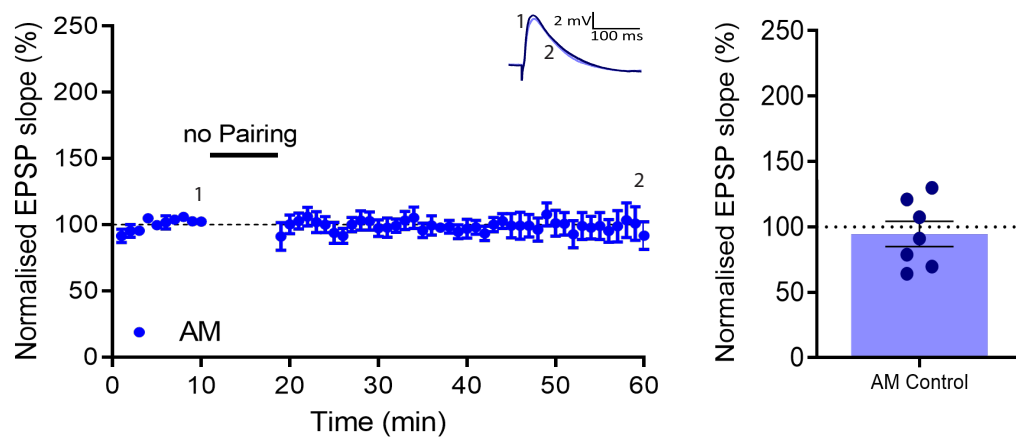

B

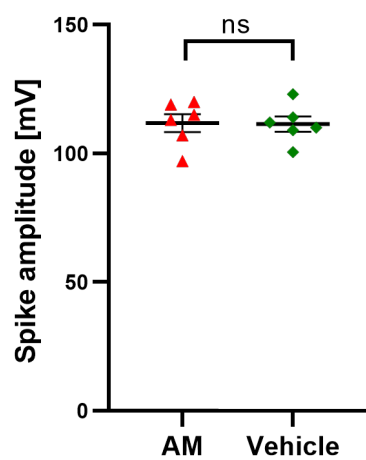

C

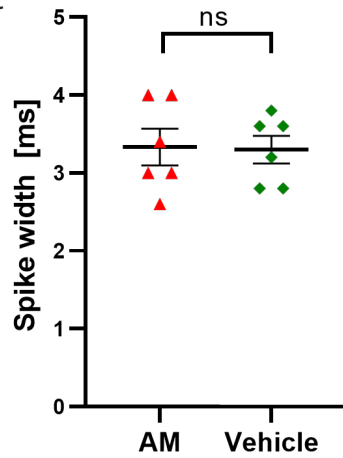

Supplement: supp [file elife_poa_e81071_Figure_5_figure_supplement_1.pdf › elife_poa_e81071_Figure_5_figure_supplement_1.pdf]

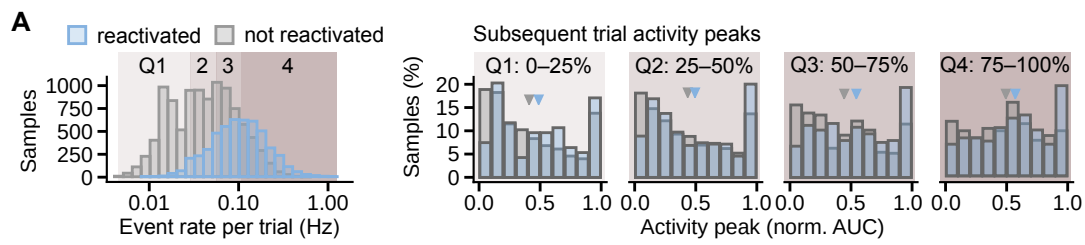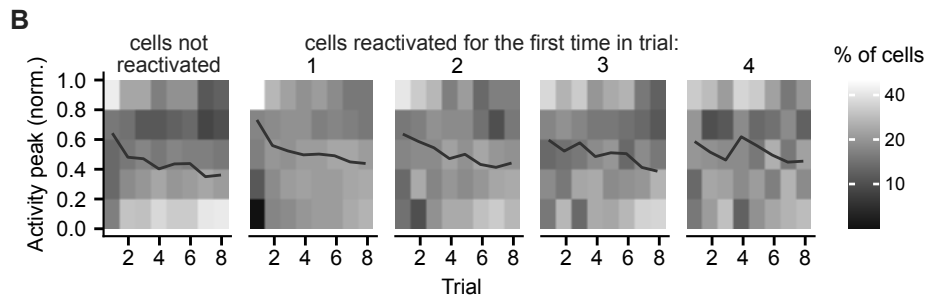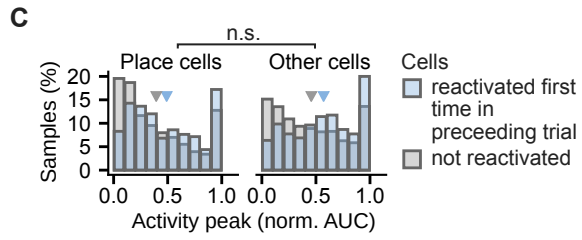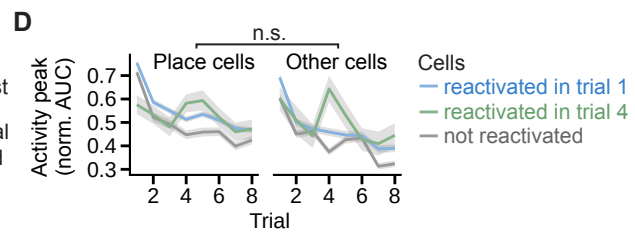

Supplement: supp [file elife_poa_e81071_Figure_8_figure_supplement_1.pdf › elife_poa_e81071_Figure_8_figure_supplement_1.pdf]

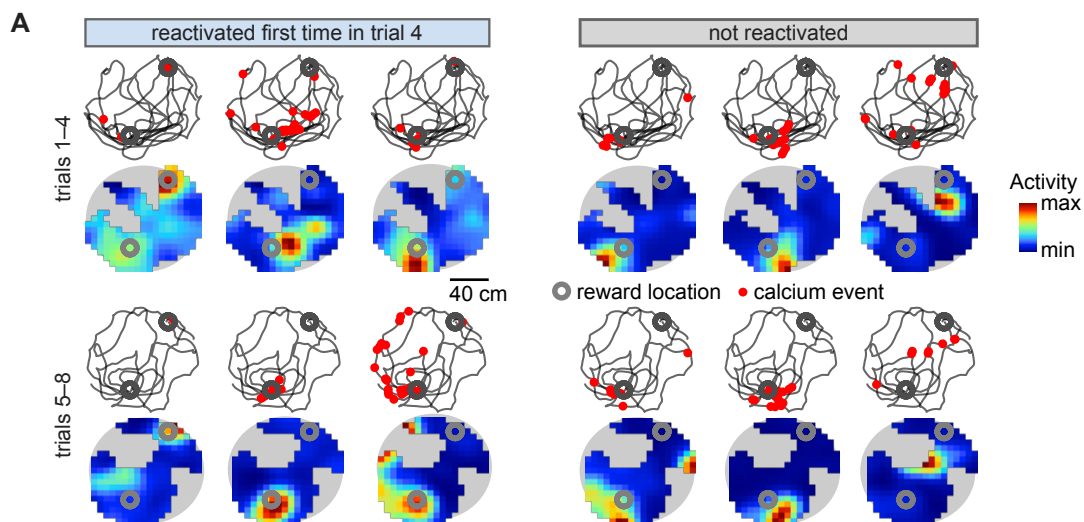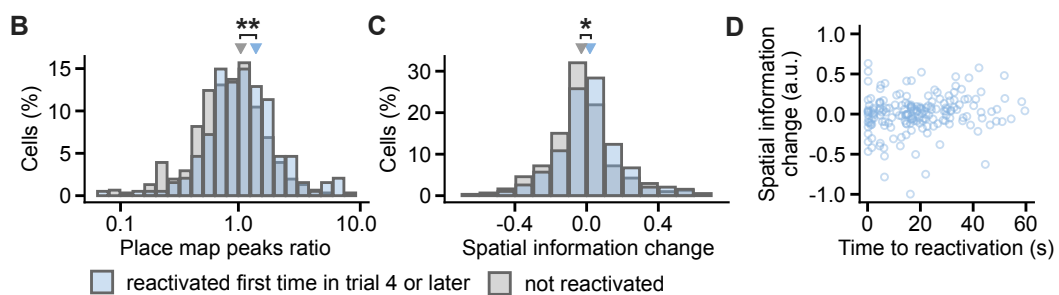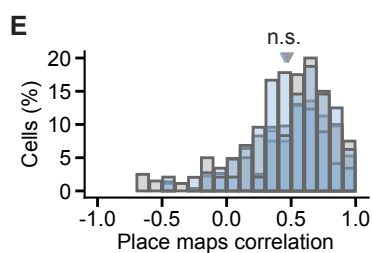

Supplement: supp [file elife_poa_e81071_Figure_8_figure_supplement_2.pdf › elife_poa_e81071_Figure_8_figure_supplement_2.pdf]
